# Supplementary material for: Single-cell mass cytometry reveals complex myeloid cell composition in active lesions of progressive multiple sclerosis
Source: PubMed Central journal article supplement (PMC7437178; doi:10.1186/s40478-020-01010-8), 2020-08-18
Supplement: 40478_2020_1010_MOESM1_ESM.pdf [file 40478_2020_1010_MOESM1_ESM.pdf]

Supplementary Table 1

Donor characteristics

| Diagn. | Gender | Age | PMD   | pH CSF | Time until processing | Cause of death                               | Disease duration | Time to EDSS6 | Tissue           | Exp./ Analysis        |
|--------|--------|-----|-------|--------|-----------------------|----------------------------------------------|------------------|---------------|------------------|-----------------------|
| CON    | M      | 92  | 8:50  | 6.89   | 19:20                 | Pneumonia                                    | -                | -             | -                | II**                  |
| CON    | F      | 77  | 8:30  | 6.21   | 18:30                 | Died during femur fracture operation         | -                | -             | -                | II**                  |
| CON    | F      | 103 | 9:50  | NA     | 22:10                 | Heart failure                                | -                | -             | -                | I, II, III            |
| CON    | M      | 97  | 5:10  | 6.65   | 12:40                 | Kidney failure                               | -                | -             | -                | I, II, III            |
| CON    | M      | 86  | 6:45  | 6.39   | 14:10                 | Complications due to leaking EVAR prosthesis | -                | -             | -                | I, II, III            |
| CON    | F      | 95  | 4:21  | 6.59   | 9:10                  | Ileus caused by tumor                        | -                | -             | -                | I, II, III            |
| CON    | F      | 96  | 8:30  | 6.70   | NA                    | Stopped drinking & eating                    | -                | -             | -                | I, II, III            |
| CON    | M      | 72  | 6:55  | 6.81   | NA                    | Multiple myeloma and renal insufficiency     | -                | -             | -                | I, II, III            |
| PPMS   | M      | 75  | 9:05  | NA     | 5:10                  | Euthanasia                                   | 42               | 31            | NAWM             | II**, IMC             |
| SPMS   | F      | 65  | 10:20 | 6.56   | 9:20                  | Pneumonia                                    | 37               | 14            | NAWM             | II**                  |
| SPMS   | M      | 65  | 9:30  | 6.50   | 8:00                  | Euthanasia                                   | 34               | 8             | NAWM & Lesion    | I, II, III, IMC       |
| SPMS   | F      | 51  | 9:10  | 6.87   | 4:45                  | Euthanasia                                   | 17               | 16            | NAWM & 2x Lesion | I, II, III, IMC, Flow |
| SPMS   | M      | 70  | 9:25  | 7.22   | 9:50                  | Euthanasia                                   | 33               | 20            | NAWM & 2x Lesion | I, II, III, IMC, Flow |
| SPMS   | F      | 67  | 9:20  | NA     | 13:30                 | Pneumonia                                    | 25               | 11            | NAWM & Lesion    | I, II, III, IMC, Flow |
| PPMS*  | F      | 67  | 5:45  | 6.62   | 13:10                 | Euthanasia                                   | 6                | 8             | NAWM & Lesion    | I, II, III, IMC, Flow |
| PPMS*  | M      | 67  | 7:55  | 6.40   | 23:50                 | Euthanasia                                   | 11               | 5             | NAWM & Lesion    | I, II, III, IMC, Flow |
| SPMS*  | F      | 50  | 10:15 | 6.44   | 7:35                  | Euthanasia                                   | 13               | 11            | NAWM & 2x Lesion | I, II, III, Flow      |
| SPMS*  | M      | 56  | 6:15  | 6.60   | 20:15                 | Pneumonia                                    | 19               | 7             | NAWM             | I, II, III, Flow      |

Diagn. = diagnosis; PMD = post-mortem delay (hr:min); CSF = cerebrospinal fluid; CON = non-MS control donors; SPMS = secondary progressive multiple sclerosis; PPMS = primary progressive multiple sclerosis; F = female; M = male; NA = not available; NAWM = normal-appearing white matter; IMC = imaging CyTOF; Flow = flow cytometry; Time until processing= time tissue was stored in Hiberate-A medium until processing (hrs:min); \*MS diagnosis based on clinical data, diagnosis is not yet confirmed by neuropathologist; \*\*Due to low cell number, these donors can be analyzed only in one experiment (Exp-II)

**Supplementary Table 2** Summary of donor characteristics

| Diagn.                                   | N  | F/M     | Age (yr)      | PMD (hr:min) | pH CSF      | Disease Duration (yr) | Time to EDSS 6 (yr) |
|------------------------------------------|----|---------|---------------|--------------|-------------|-----------------------|---------------------|
| CON                                      | 8  | 4/4     | 89.75 ± 10.63 | 7:40 ± 1:42  | 6.69 ± 0.19 | -                     | -                   |
| MS                                       | 10 | 5/5     | 63.30 ± 8.23  | 6:42 ± 1:34  | 6.65 ± 0.27 | 24.7 ± 11             | 13.1 ± 7.8          |
| <i>p</i> value (unpaired <i>t</i> -test) |    | >0.9999 | <0.0001       | 0.2369       | 0.7973      | -                     | -                   |

Diagn. = diagnosis; PMD = post-mortem delay (hr:min); CSF = cerebrospinal fluid; CON = control donors; MS = multiple sclerosis donors; F = female; M = male

**Supplementary Table 3** Donor characteristics – IRF8+ nuclei analysis by qPCR

| NBB no.                                   | Tissue        | Diagn. | Gender | Age    | PMD    | pH CSF | Cause of death                       | Disease duration |
|-------------------------------------------|---------------|--------|--------|--------|--------|--------|--------------------------------------|------------------|
| 1996-026                                  | NAWM          | SPMS   | F      | 69     | 09:15  | 6.40   | General decline due to MS            | 19               |
| 1998-158                                  | NAWM          | SPMS   | F      | 76     | 14:15  | 5.93   | Respiratory insufficiency            | 34               |
| 1999-073                                  | NAWM          | MS     | F      | 71     | 08:20  | 6.80   | Pneumonia                            | 24               |
| 1999-119                                  | NAWM          | RRMS   | F      | 38     | 05:15  | 6.55   | Sudden death, unknown cause          | 9                |
| 2000-024                                  | NAWM          | PPMS   | F      | 52     | 08:25  | 6.10   | Respiratory failure during pneumonia | 12               |
| 2001-093                                  | NAWM          | SPMS   | F      | 66     | 06:20  | 6.44   | Cancer metastasis in liver           | 43               |
| 2012-056                                  | NAWM          | SPMS   | M      | 78     | 08:45  | 6.41   | Euthanasia                           | 33               |
| 1999-109                                  | Active lesion | SPMS   | M      | 70     | 06:25  | 6.28   | Pneumonia                            | 22               |
| 2001-135                                  | Active lesion | SPMS   | M      | 43     | 08:30  | 6.48   | Pneumonia                            | 26               |
| 2007-085                                  | Active lesion | SPMS   | F      | 66     | 06:00  | 6.18   | unknown                              | 23               |
| 2010-025                                  | Active lesion | SPMS   | M      | 51     | 11:00  | 6.23   | unknown                              | 16               |
| 2001-018                                  | Active lesion | SPMS   | F      | 48     | 8:10   | 6.55   | Euthanasia                           | 8                |
| <i>p</i> -value (unpaired <i>t</i> -test) |               |        | 0.2222 | 0.2936 | 0.6815 | 0.8289 | -                                    | 0.5536           |

Age = age at death (years); CSF = cerebrospinal fluid; Disease duration (years); F = female; M = male; PPMS = primary progressive MS, RRMS = relapsing-remitting MS; SPMS = secondary progressive MS; NAWM = normal-appearing white matter; NBB no. = donor registration number of the Netherlands Brain Bank; PMD = post-mortem delay (h:min).

**Supplementary Table 4**Primer pairs used for RT-qPCR analysis of IRF8<sup>+</sup> nuclei

| <b>Gene symbol</b> | <b>Forward sequence (5'-3')</b> | <b>Reverse sequence (5'-3')</b> |
|--------------------|---------------------------------|---------------------------------|
| <i>ADGRG1</i>      | CTCTCCTAAGAGGTTCTCTCCA          | CTACAACAGGCCAGCAATCTA           |
| <i>CX3CR1</i>      | GGACTGTGTTCTGTCCATATT           | GTGACACTCTTGGGCTTCTT            |
| <i>EEF1A</i>       | AAGCTGGAAGATGGCCCTAAA           | AAGCGACCCAAAGGTGGAT             |
| <i>GAPDH</i>       | TGCACCACCAACTGCCTTAGC           | GGCATGGACTGTGGTCATGA            |
| <i>P2RY12</i>      | CTGTGCACCAGAGACTACAA            | GCCAGGCCATTTGTGATAAG            |
| <i>TMEM119</i>     | CAACTTCTGGATGGGATAGTG           | AGACGATGAACATCAGCAGAAA          |

**Supplementary Table 5**

List of antibodies used for flow cytometry

| <b>target</b>                        | <b>clone / company</b> | <b>fluorochrome</b> | <b>dilution</b> |
|--------------------------------------|------------------------|---------------------|-----------------|
| CD3                                  | SK7 / BD Biosciences   | PerCP-Cy5.5         | 1:25            |
| CD11b                                | ICRF44 / eBioscience   | PE<br>PE-Cy7        | 1:200           |
| CD19                                 | SJ25C1 / BD Bioscience | PerCP-Cy5.5         | 1:20            |
| CD45                                 | HI30 / BD Biosciences  | BB515               | 1:200           |
| CD56                                 | HCD56 / BioLegend      | PerCP-Cy5.5         | 1:100           |
| CD66b                                | G10F5 / BioLegend      | PerCP-Cy5.5         | 1:100           |
| CX3CR1                               | 2A9-1 / eBioscience    | PE-Cy7              | 1:200           |
| GPR56                                | CG4 / BioLegend        | PE-Cy7              | 1:100           |
| P2Y <sub>12</sub>                    | S16001E / BioLegend    | PE-Cy7              | 1:100           |
| fixable viability dye<br>eFluor™ 506 | -                      | eFluor™ 506         | 1:500           |

Supplementary Table 6

Donor characteristics

| NBB no.                                   | Diagn. | Gender | Age    | PMD    | pH CSF | Cause of death                                                | Disease duration | Tissue        |
|-------------------------------------------|--------|--------|--------|--------|--------|---------------------------------------------------------------|------------------|---------------|
| 10-015                                    | CON    | F      | 73     | 07:45  | NA     | Palliative sedation in end stage metastasized mamma carcinoma | -                | WM            |
| 11-091                                    | CON    | M      | 76     | 06:45  | 6.31   | Lung cancer                                                   | -                | WM            |
| 12-002                                    | CON    | M      | 55     | 07:15  | NA     | Intestinal ischemia                                           | -                | WM            |
| 15-055                                    | CON    | F      | 72     | 06:50  | 7.22   | Euthanasia and metastatic ovarian cancer                      | -                | WM            |
| 17-005                                    | CON    | F      | 60     | 05:30  | 7.07   | Euthanasia                                                    | -                | WM            |
| 01-137                                    | SPMS   | M      | 81     | 8:50   | 6.33   | Marginal intake of food, drinks and medication                | 51               | Active lesion |
| 06-045                                    | SPMS   | M      | 56     | 8:00   | 6.65   | Pneumonia                                                     | 21               | Active lesion |
| 10-034                                    | SPMS   | F      | 57     | 8:40   | 6.05   | Respiratory insufficiency by (uro)sepsis                      | 27               | Active lesion |
| 12-084                                    | SPMS   | M      | 63     | 8:15   | 8:15   | Pneumonia, cachexia and dehydration                           | 27               | Active lesion |
| <i>p</i> -value (unpaired <i>t</i> -test) |        | 0.5238 | 0.6812 | 0.0093 | 0.9098 | -                                                             | -                | -             |

Age in years, Diagn. = diagnosis; Disease duration in years, PMD = post-mortem delay (hr:min); CSF = cerebrospinal fluid; CON = control donors; MS = multiple sclerosis donors; SPMS = secondary progressive multiple sclerosis; F = female; M = male; NA = not available; NBB= Netherlands brain bank; WM= white matter

**Supplementary Table 7**

List of all CyTOF antibodies and reagents used

| <b>target</b>  | <b>clone / company</b>            | <b>catalogue no.</b> | <b>dilution</b> |
|----------------|-----------------------------------|----------------------|-----------------|
| ABCA7          | polyclonal / Merck                | ABC349               | 1:50            |
| ApoE           | WUE-4 / Novus Biologicals         | NB110-60531          | 1:100           |
| AXL            | polyclonal / Lifespan Biosciences | LS-C100246-400       | 1:50            |
| CCL2           | 5D3-F7 / Biolegend                | 502601               | 1:100           |
| CCR2           | K036C2 / Biolegend                | 357202               | 1:100           |
| CD3            | UCHT1 / Fluidigm                  | 3154003B             | 1:100           |
| CD4            | RPA-T4 / Biolegend                | 300541               | 1:100           |
| CD8a           | RPA-T8 / Fluidigm                 | 3162015B             | 1:100           |
| CD11c          | Bu15 / Fluidigm                   | 3147008B             | 1:100           |
| CD14           | RMO52 / Fluidigm                  | 3160006B or 3148010B | 1:100           |
| CD16           | 3G8 / Biolegend                   | 302002               | 1:100           |
| CD19           | HIB19 / Fluidigm                  | 3142001B             | 1:100           |
| CD32           | 6C4 / eBioscience                 | 11-0329-42           | 1:100           |
| CD33           | WM53 / Fluidigm                   | 3169010B             | 1:100           |
| CD35           | 594708 / R&D Systems              | MAB5748              | 1:100           |
| CD36           | 5-271 / Biolegend                 | 336215               | 1:100           |
| CD38           | HIT2 / Fluidigm                   | 3144014B             | 1:100           |
| CD44           | BJ18 / Biolegend                  | 338802               | 1:20            |
| CD45           | HI30 / Fluidigm                   | 3141009B             | 1:100           |
| CD47           | CC2C6 / Fluidigm                  | 3209004B             | 1:100           |
| CD54 (ICAM1)   | HA58 / Biolegend                  | 353102               | 1:100           |
| CD56           | B159 / Fluidigm                   | 3155008B             | 1:100           |
| CD56           | NCAM16.2 / Fluidigm               | 3149021B             | 1:100           |
| CD61           | VI-PL2 / Fluidigm                 | 3209001B             | 1:100           |
| CD64           | 10.1 / Fluidigm                   | 3146006B             | 1:100           |
| CD66b          | 80H3 / Fluidigm                   | 3152011B             | 1:100           |
| CD68           | Y1/82A / Biolegend                | 333802               | 1:100           |
| CD74           | LN2 / Fluidigm                    | 3166018B             | 1:50            |
| CD86           | IT2.2 / Biolegend                 | 305435               | 1:100           |
| CD91           | A2MR- $\alpha$ 2 / BD Bioscience  | 550495               | 1:100           |
| CD95           | DX2 / Biolegend                   | 305602               | 1:100           |
| CD115          | 9-4D2-1E4 / Biolegend             | 347302               | 1:100           |
| CD116          | 4HI / Biolegend                   | 305902               | 1:100           |
| CD130          | 2E1B02 / Fluidigm                 | 3168016B             | 1:100           |
| CD141          | 1A4 / Fluidigm                    | 3173002B             | 1:100           |
| CD163          | GHI/61 / Biolegend                | 333602               | 1:100           |
| CD169          | CD169 / Fluidigm                  | 3158027B             | 1:100           |
| CD172a         | 15-414 / Biolegend                | 372102               | 1:100           |
| CD206          | 15-2 / Fluidigm                   | 3168008B             | 1:100           |
| CD274          | 29E.2A3 / Fluidigm                | 3156026B             | 1:100           |
| CD369          | 15E2 / Biolegend                  | 355402               | 1:50            |
| Clec12A        | 50C1 / Fluidigm                   | 3173007B             | 1:100           |
| Complement C3c | 4C6A8 / Novus Biologicals         | NBP2-61855           | 1:50            |
| CyclinB1       | GNS-1 / Fluidigm                  | 3153009A             | 1:100           |

**Supplementary Table 7**List of all CyTOF antibodies and reagents used - *continued*

| <b>target</b>     | <b>clone / company</b>            | <b>catalogue no.</b> | <b>dilution</b> |
|-------------------|-----------------------------------|----------------------|-----------------|
| CXCR3             | G025H7 / Fluidigm                 | 3163004B             | 1:100           |
| CX3CR1            | 2A9-1 / Fluidigm                  | 3172017B             | 1:50            |
| EMR1              | A10 / Bio-Rad                     | MCA2674GA            | 1:100           |
| Galanin           | 581403 / Fluidigm                 | 3148016B             | 1:100           |
| Galectin-9        | 9M1-3 / Fluidigm                  | 3163002B             | 1:100           |
| GATA6             | D61E4 / Fluidigm                  | 3161005A             | 1:100           |
| Glut5             | 195205 / R&D Systems              | MAB1349              | 1:100           |
| GM-CSF            | BVD2-21C11 / Biolegend            | 502315               | 1:100           |
| GPR56             | CG4 / Biolegend                   | 358202               | 1:50            |
| HLA-DR            | L243 / Fluidigm                   | 3143013B             | 1:100           |
| IFN $\alpha$      | LT27:295 / Miltenyi Biotec        | 130-099-214          | 1:10            |
| IFN $\gamma$      | B27 / Fluidigm                    | 3168005B             | 1:100           |
| IL-1 $\beta$      | H1b-98 / Biolegend                | 511703               | 1:100           |
| IL-6              | MQ2-13A5 / Biolegend              | 501101               | 1:100           |
| IL-10             | JES3-9D7 / Fluidigm               | 3166008B             | 1:20            |
| IRF4              | IRF4.3E4 / Biolegend              | 646402               | 1:100           |
| IRF7              | 12G9A36 / Biolegend               | 656002               | 1:50            |
| IRF8              | 7G11A45 / Biolegend               | 656502               | 1:100           |
| MIP-1 $\beta$     | D21-1351 / Fluidigm               | 3150004B             | 1:100           |
| MS4A4A            | 818112 / R&D Systems              | MAB7797              | 1:50            |
| NFAT1             | D43B1 / Fluidigm                  | 3143023A             | 1:100           |
| OPN               | polyclonal / Lifespan Biosciences | LS-C99283-400        | 1:100           |
| P2Y <sub>12</sub> | polyclonal / Sigma-Aldrich        | HPA014518            | 1:100           |
| TGF- $\beta$      | TW4-2F8 / Biolegend               | 349602               | 1:100           |
| TIM3              | F38-2E2 / Biolegend               | 345019               | 1:100           |
| TLR2              | TL2.1 / Fluidigm                  | 3176021B             | 1:100           |
| TLR3              | TLR3.7 / eBioscience              | 13-9039-80           | 1:50            |
| TMEM119           | A16075D / Biolegend               | 853302               | 1:10            |
| TNF               | Mab11 / Fluidigm                  | 3146010B             | 1:100           |
| TREM2             | 237920 / R&D Systems              | MAB17291             | 1:50            |
| DNA               | - / Fluidigm                      | 201192A              | 1:1000          |
| DNA               | - / Fluidigm                      | 201192A              | 1:1000          |

Supplementary Table 8

List of antibodies for *Exp-I*, *-II* and *III*

| isotope tag       | target            |               |                |
|-------------------|-------------------|---------------|----------------|
|                   | <i>Exp-I</i>      | <i>Exp-II</i> | <i>Exp-III</i> |
| <sup>141</sup> Pr | CD45              | HLA-DR (T)    | HLA-DR (T)     |
| <sup>142</sup> Nd | CD19              | CD116 (T)     | CD116 (T)      |
| <sup>143</sup> Nd | HLA-DR            | NFAT1         | NFAT1          |
| <sup>144</sup> Nd | CD44              | CD44          | CD38           |
| <sup>145</sup> Nd | CD4               | IRF7 (T)      | IRF7 (T)       |
| <sup>146</sup> Nd | TNF               | TNF           | CD64           |
| <sup>147</sup> Sm | CD11c             | CD11c (T)     | CD11c (T)      |
| <sup>148</sup> Nd | Galanin           | Galanin       | CD14*          |
| <sup>149</sup> Sm | CCI2              | CD56 (T)      | CD56 (T)       |
| <sup>150</sup> Nd | CD86*             | MIP-1 $\beta$ | MIP-1 $\beta$  |
| <sup>151</sup> Eu | CD68              | CD35 (T)      | CD35 (T)       |
| <sup>152</sup> Sm | CD66b             | CD95 (T)      | CD95 (T)       |
| <sup>153</sup> Eu | CyclinB1          | IL-6*         | TIM3           |
| <sup>154</sup> Sm | CD3               | CD172a (T)    | CD172a (T)     |
| <sup>155</sup> Gd | CD56              | CD54 (T)      | CD54 (T)       |
| <sup>156</sup> Gd | IL-6*             | CD274 (T)     | CD274 (T)      |
| <sup>158</sup> Gd | CD369             | CD169 (T)     | CD169 (T)      |
| <sup>159</sup> Tb | IRF4              | GM-CSF        | GM-CSF         |
| <sup>160</sup> Gd | CD14*             | CD163         | CD32           |
| <sup>161</sup> Dy | EMR1              | CD36          | GATA6          |
| <sup>162</sup> Dy | CD8a              | CD91 (T)      | CD91 (T)       |
| <sup>163</sup> Dy | CXCR3             | Glut5         | Galectin9      |
| <sup>164</sup> Dy | TMEM119           | -             | CD115          |
| <sup>165</sup> Ho | P2Y <sub>12</sub> | IRF8          | CD16           |
| <sup>166</sup> Er | IL-10             | CD74 (T)      | CD74 (T)       |
| <sup>167</sup> Er | MS4A4A            | ABCA7         | ABCA7          |
| <sup>168</sup> Er | CD130             | CD206         | IFN $\gamma$   |
| <sup>169</sup> Tm | CD33              | TGF- $\beta$  | TGF- $\beta$   |
| <sup>170</sup> Er | GPR56             | CD86*         | TLR3           |
| <sup>171</sup> Yb | TREM2             | CCR2 (T)      | CCR2 (T)       |
| <sup>172</sup> Yb | CX3CR1            | OPN           | OPN            |
| <sup>173</sup> Yb | Clec12A           | Clec12A       | CD141          |
| <sup>174</sup> Yb | Complement C3c    | IL-1 $\beta$  | IL-1 $\beta$   |
| <sup>175</sup> Lu | ApoE              | AXL           | AXL            |
| <sup>176</sup> Yb | IFN $\alpha$      | IFN $\alpha$  | TLR2           |
| <sup>209</sup> Bi | CD61              | CD47 (T)      | CD47 (T)       |

T = Type marker; \* denotes the markers that are labelled with different metal-isotopes.

**Supplementary Table 9**

List of imaging CyTOF antibodies

| isotope tag       | target                                          | clone / company                      | catalogue No.    | dilution |
|-------------------|-------------------------------------------------|--------------------------------------|------------------|----------|
| <sup>144</sup> Nd | CD14                                            | EPR3653 / Fluidigm                   | 3144025D         | 1:50     |
| <sup>146</sup> Nd | CD16                                            | EPR16784 / Fluidigm                  | 3146020D         | 1:50     |
| <sup>147</sup> Sm | CD163                                           | EDHu-1 / Fluidigm                    | 3147021D         | 1:50     |
| <sup>149</sup> Sm | CCR4                                            | L291H4 / Fluidigm                    | 3149030D         | 1:50     |
| <sup>150</sup> Nd | CD44                                            | 156-3C11 / Bio-Rad                   | MCA2726          | 1:50     |
| <sup>152</sup> Sm | CD45                                            | D9M8I / Fluidigm                     | 3152018D         | 1:100    |
| <sup>154</sup> Sm | CD11c                                           | polyclonal / Fluidigm                | 3154025D         | 1:50     |
| <sup>158</sup> Gd | Clec7a                                          | Polyclonal / Lifespan<br>Biosciences | LS-B8826-0.05    | 1:50     |
| <sup>159</sup> Tb | CD68                                            | KP1 / Fluidigm                       | 3159035D         | 1:250    |
| <sup>165</sup> Ho | P2Y <sub>12</sub> (biotin-conjugated)<br>biotin | polyclonal/ Sigma-Aldrich            | HPA014518        | 1:100    |
|                   |                                                 | 1D4-C5 / Fluidigm                    | 3165012B         | 1:100    |
| <sup>166</sup> Er | CD74                                            | LN2 / Fluidigm                       | 3166025D         | 1:50     |
| <sup>172</sup> Yb | TNF                                             | M1-C4 / Sigma-Aldrich                | SAB1404480-100UG | 1:50     |
| <sup>174</sup> Yb | HLA-DR                                          | YE2/36 HLK / Fluidigm                | 3174023D         | 1:50     |
| <sup>191</sup> Ir | DNA                                             | - / Fluidigm                         | 201192A          | 1:1000   |
| <sup>193</sup> Ir | DNA                                             | - / Fluidigm                         | 201192A          | 1:1000   |
