# Supplementary material for: Single-cell mass cytometry reveals complex myeloid cell composition in active lesions of progressive multiple sclerosis
Source: PubMed Central journal article supplement (PMC7437178; doi:10.1186/s40478-020-01010-8), 2020-08-18
Supplement: 40478_2020_1010_MOESM2_ESM.pdf [file 40478_2020_1010_MOESM2_ESM.pdf]

NAWM

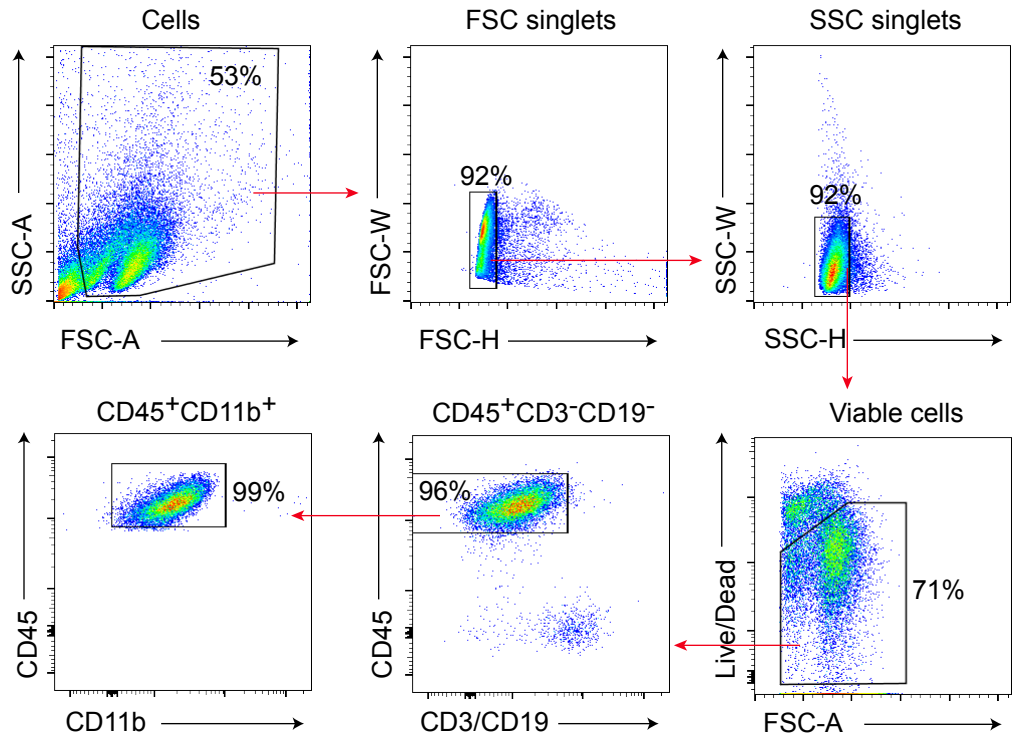

Lesion

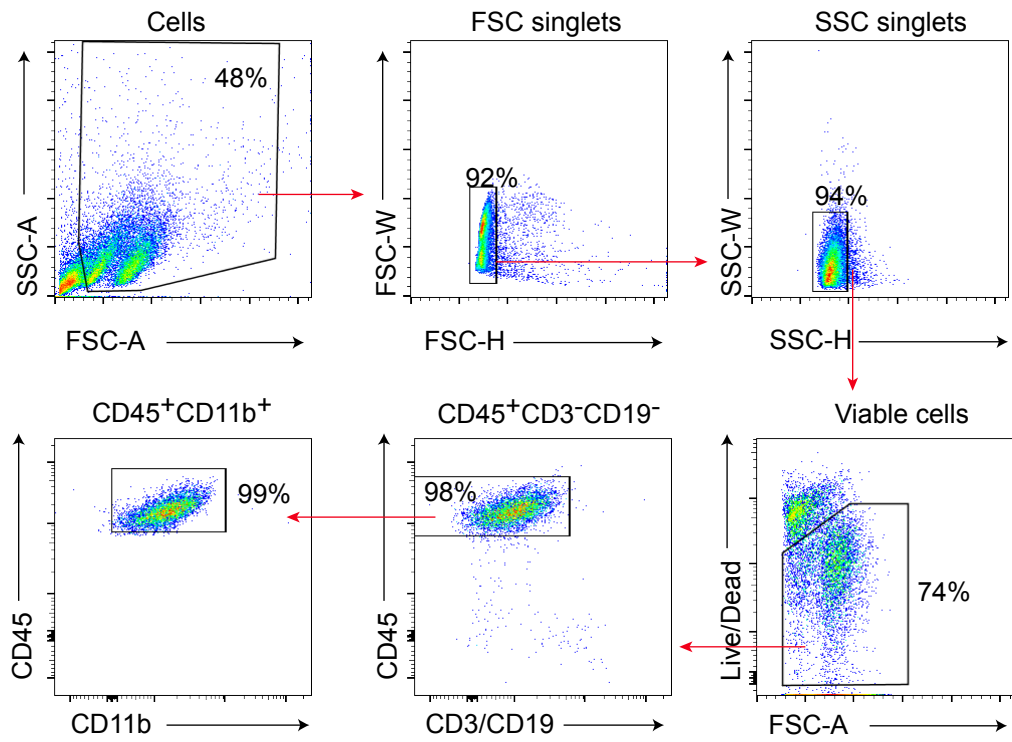

Supplementary Figure 1

**a**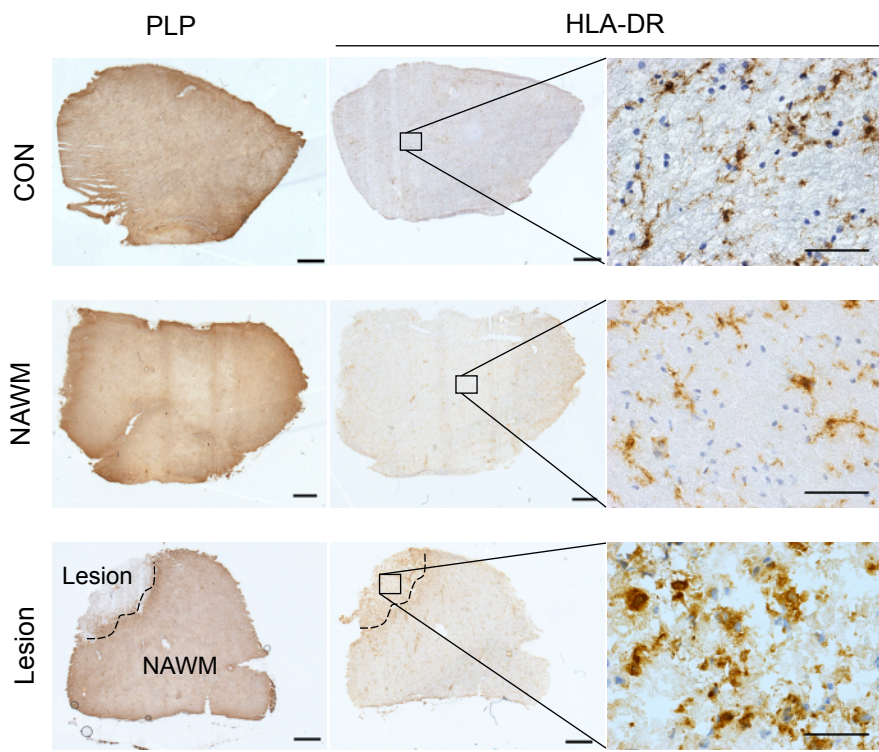**b**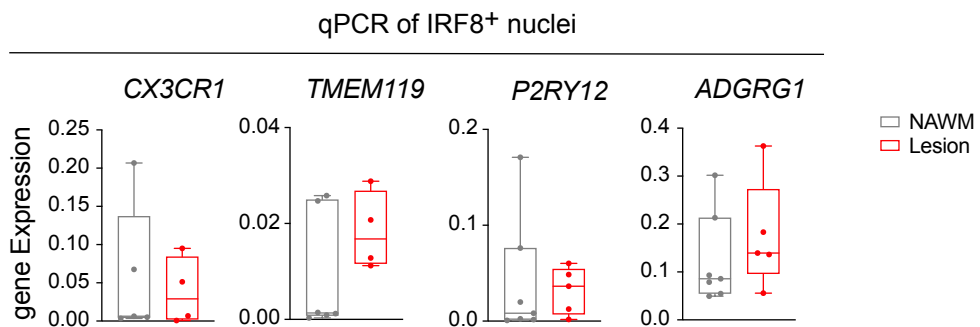**c**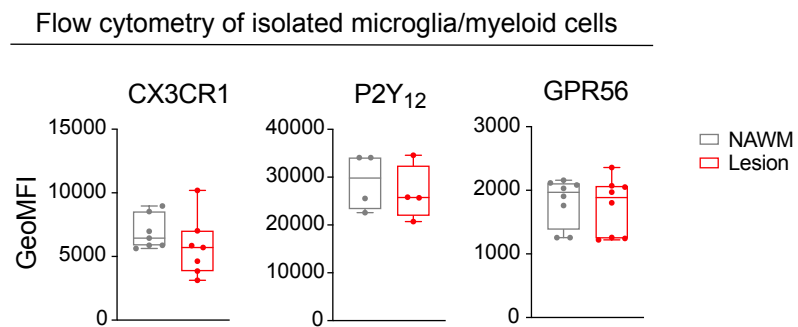**d**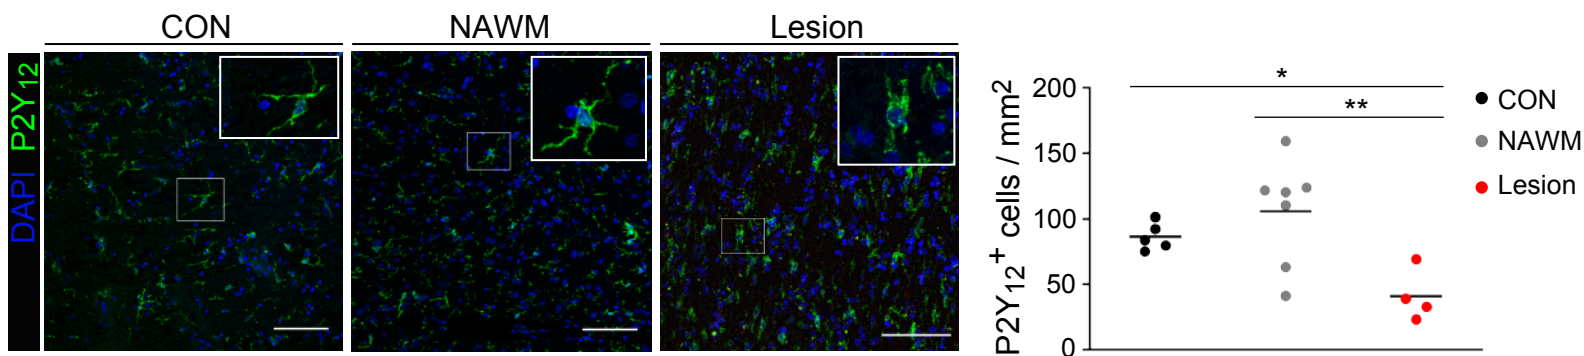

**a**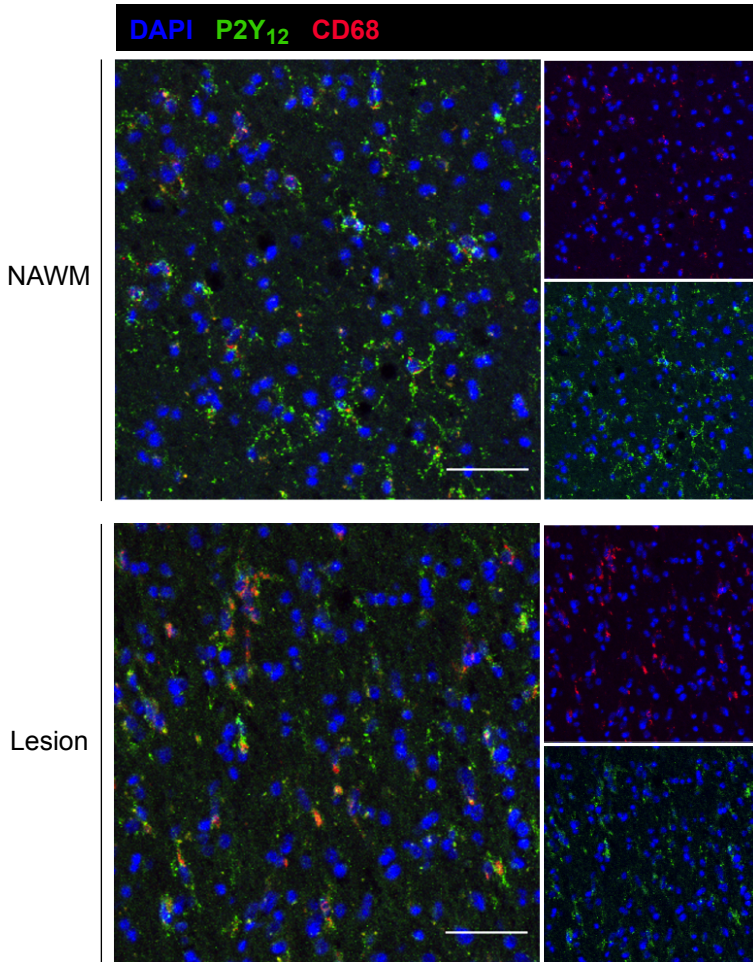**b**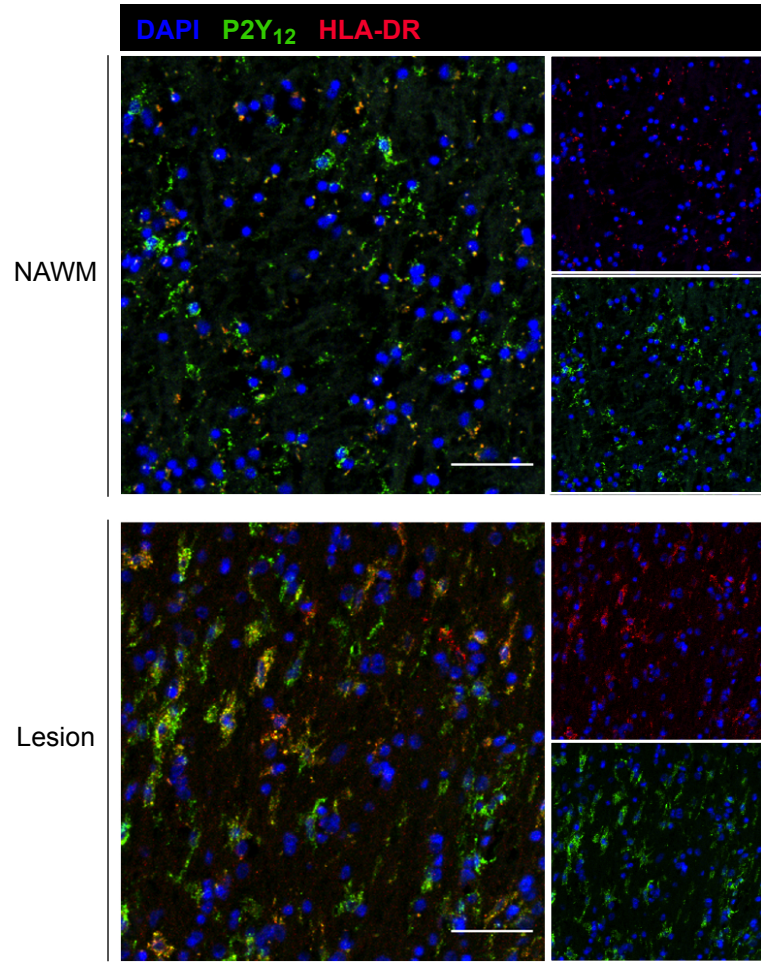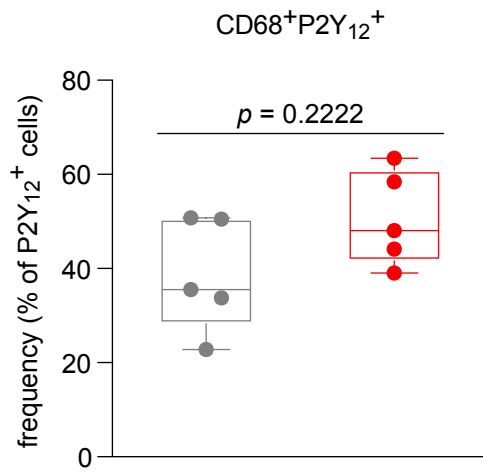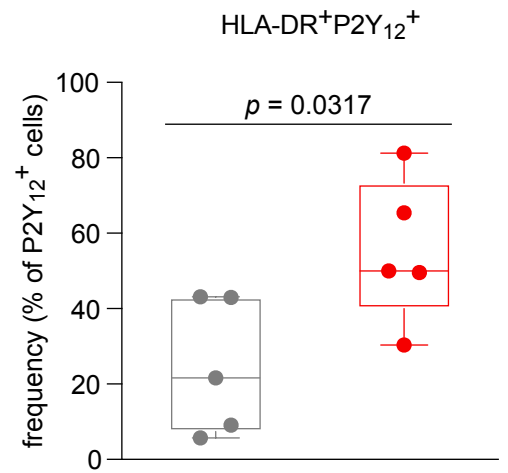**Supplementary Figure 3**

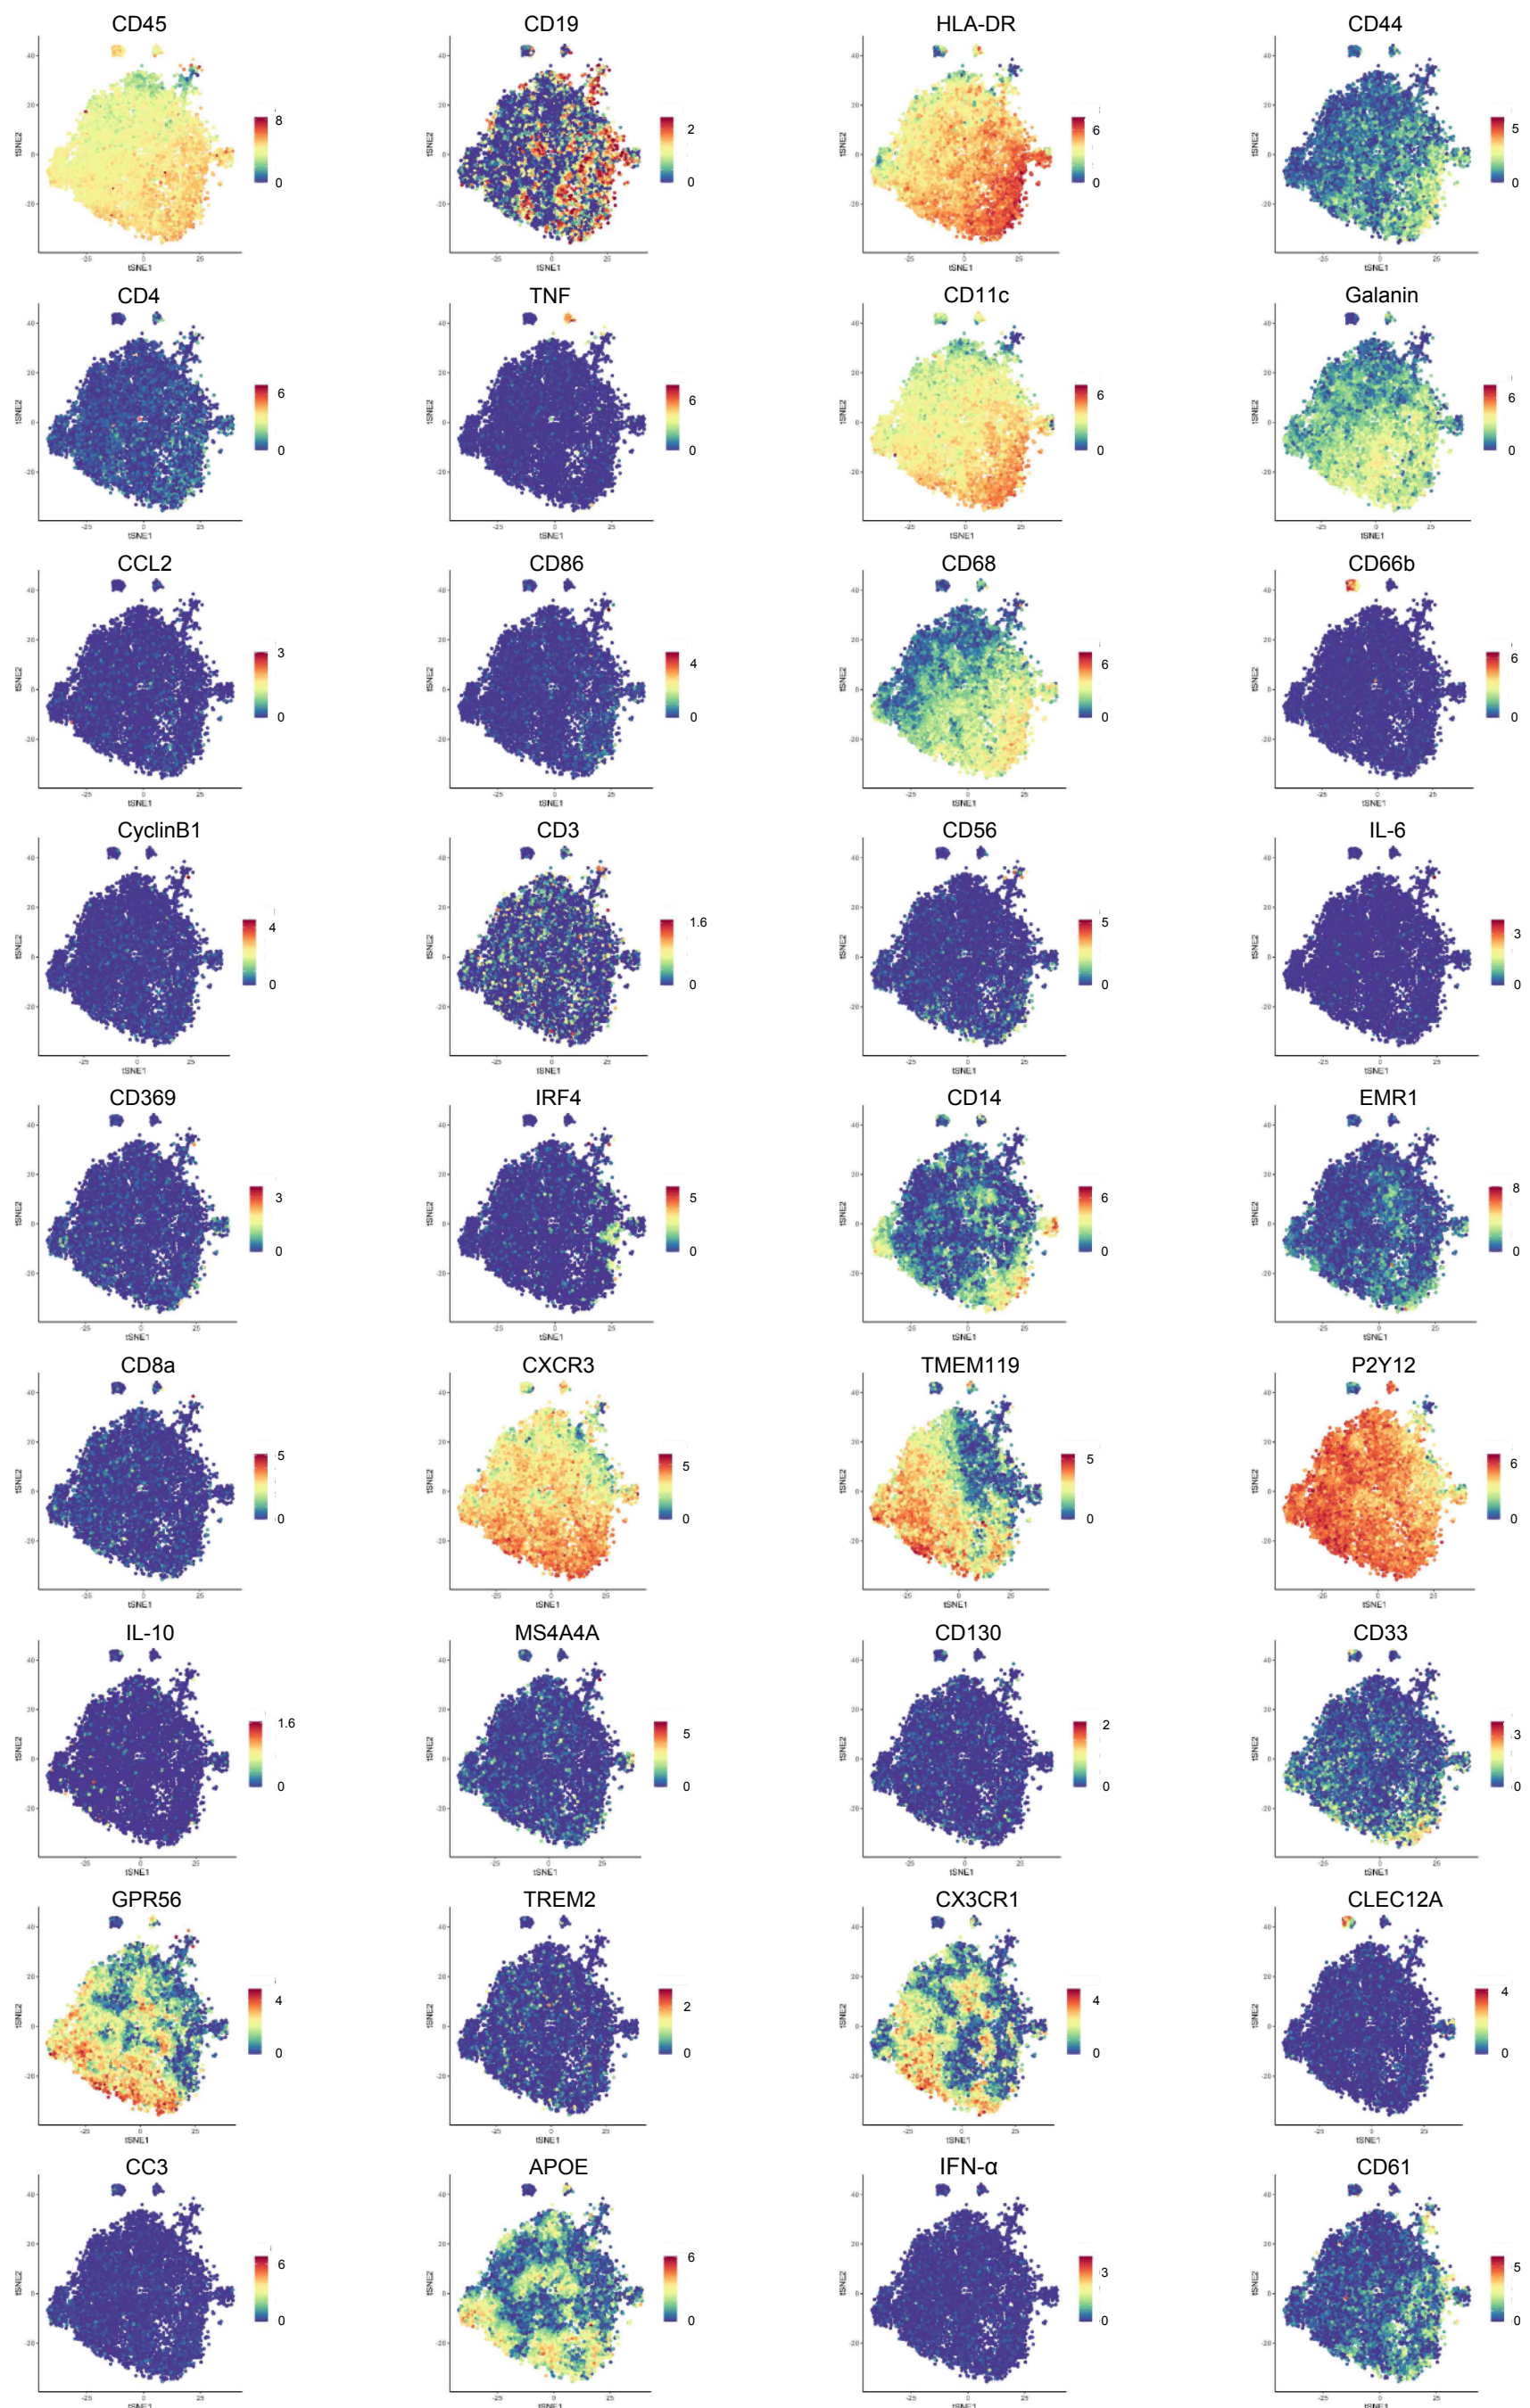

Supplementary Figure 4.

# TREM2 expression

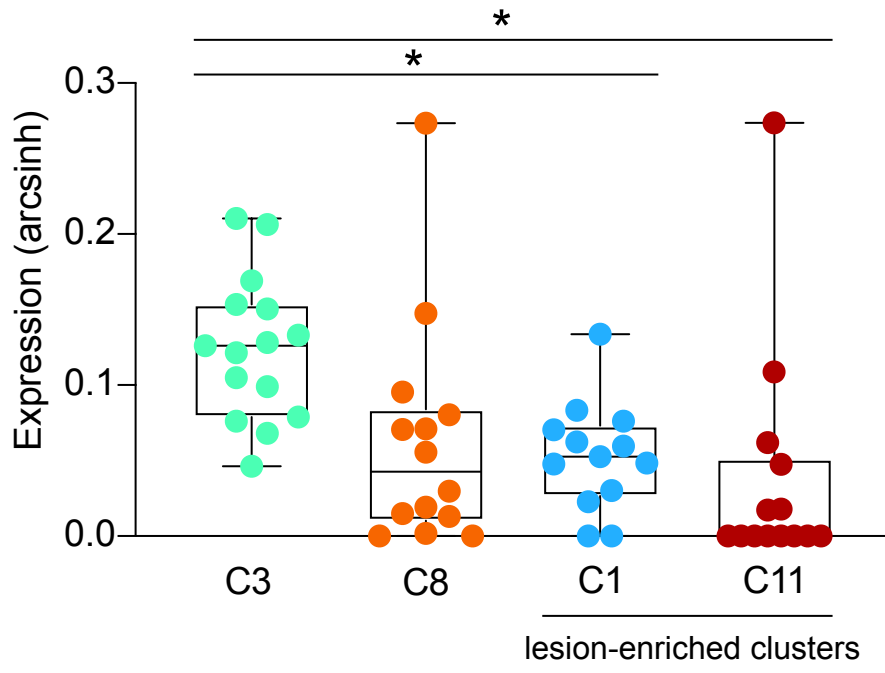

Supplementary Figure 5

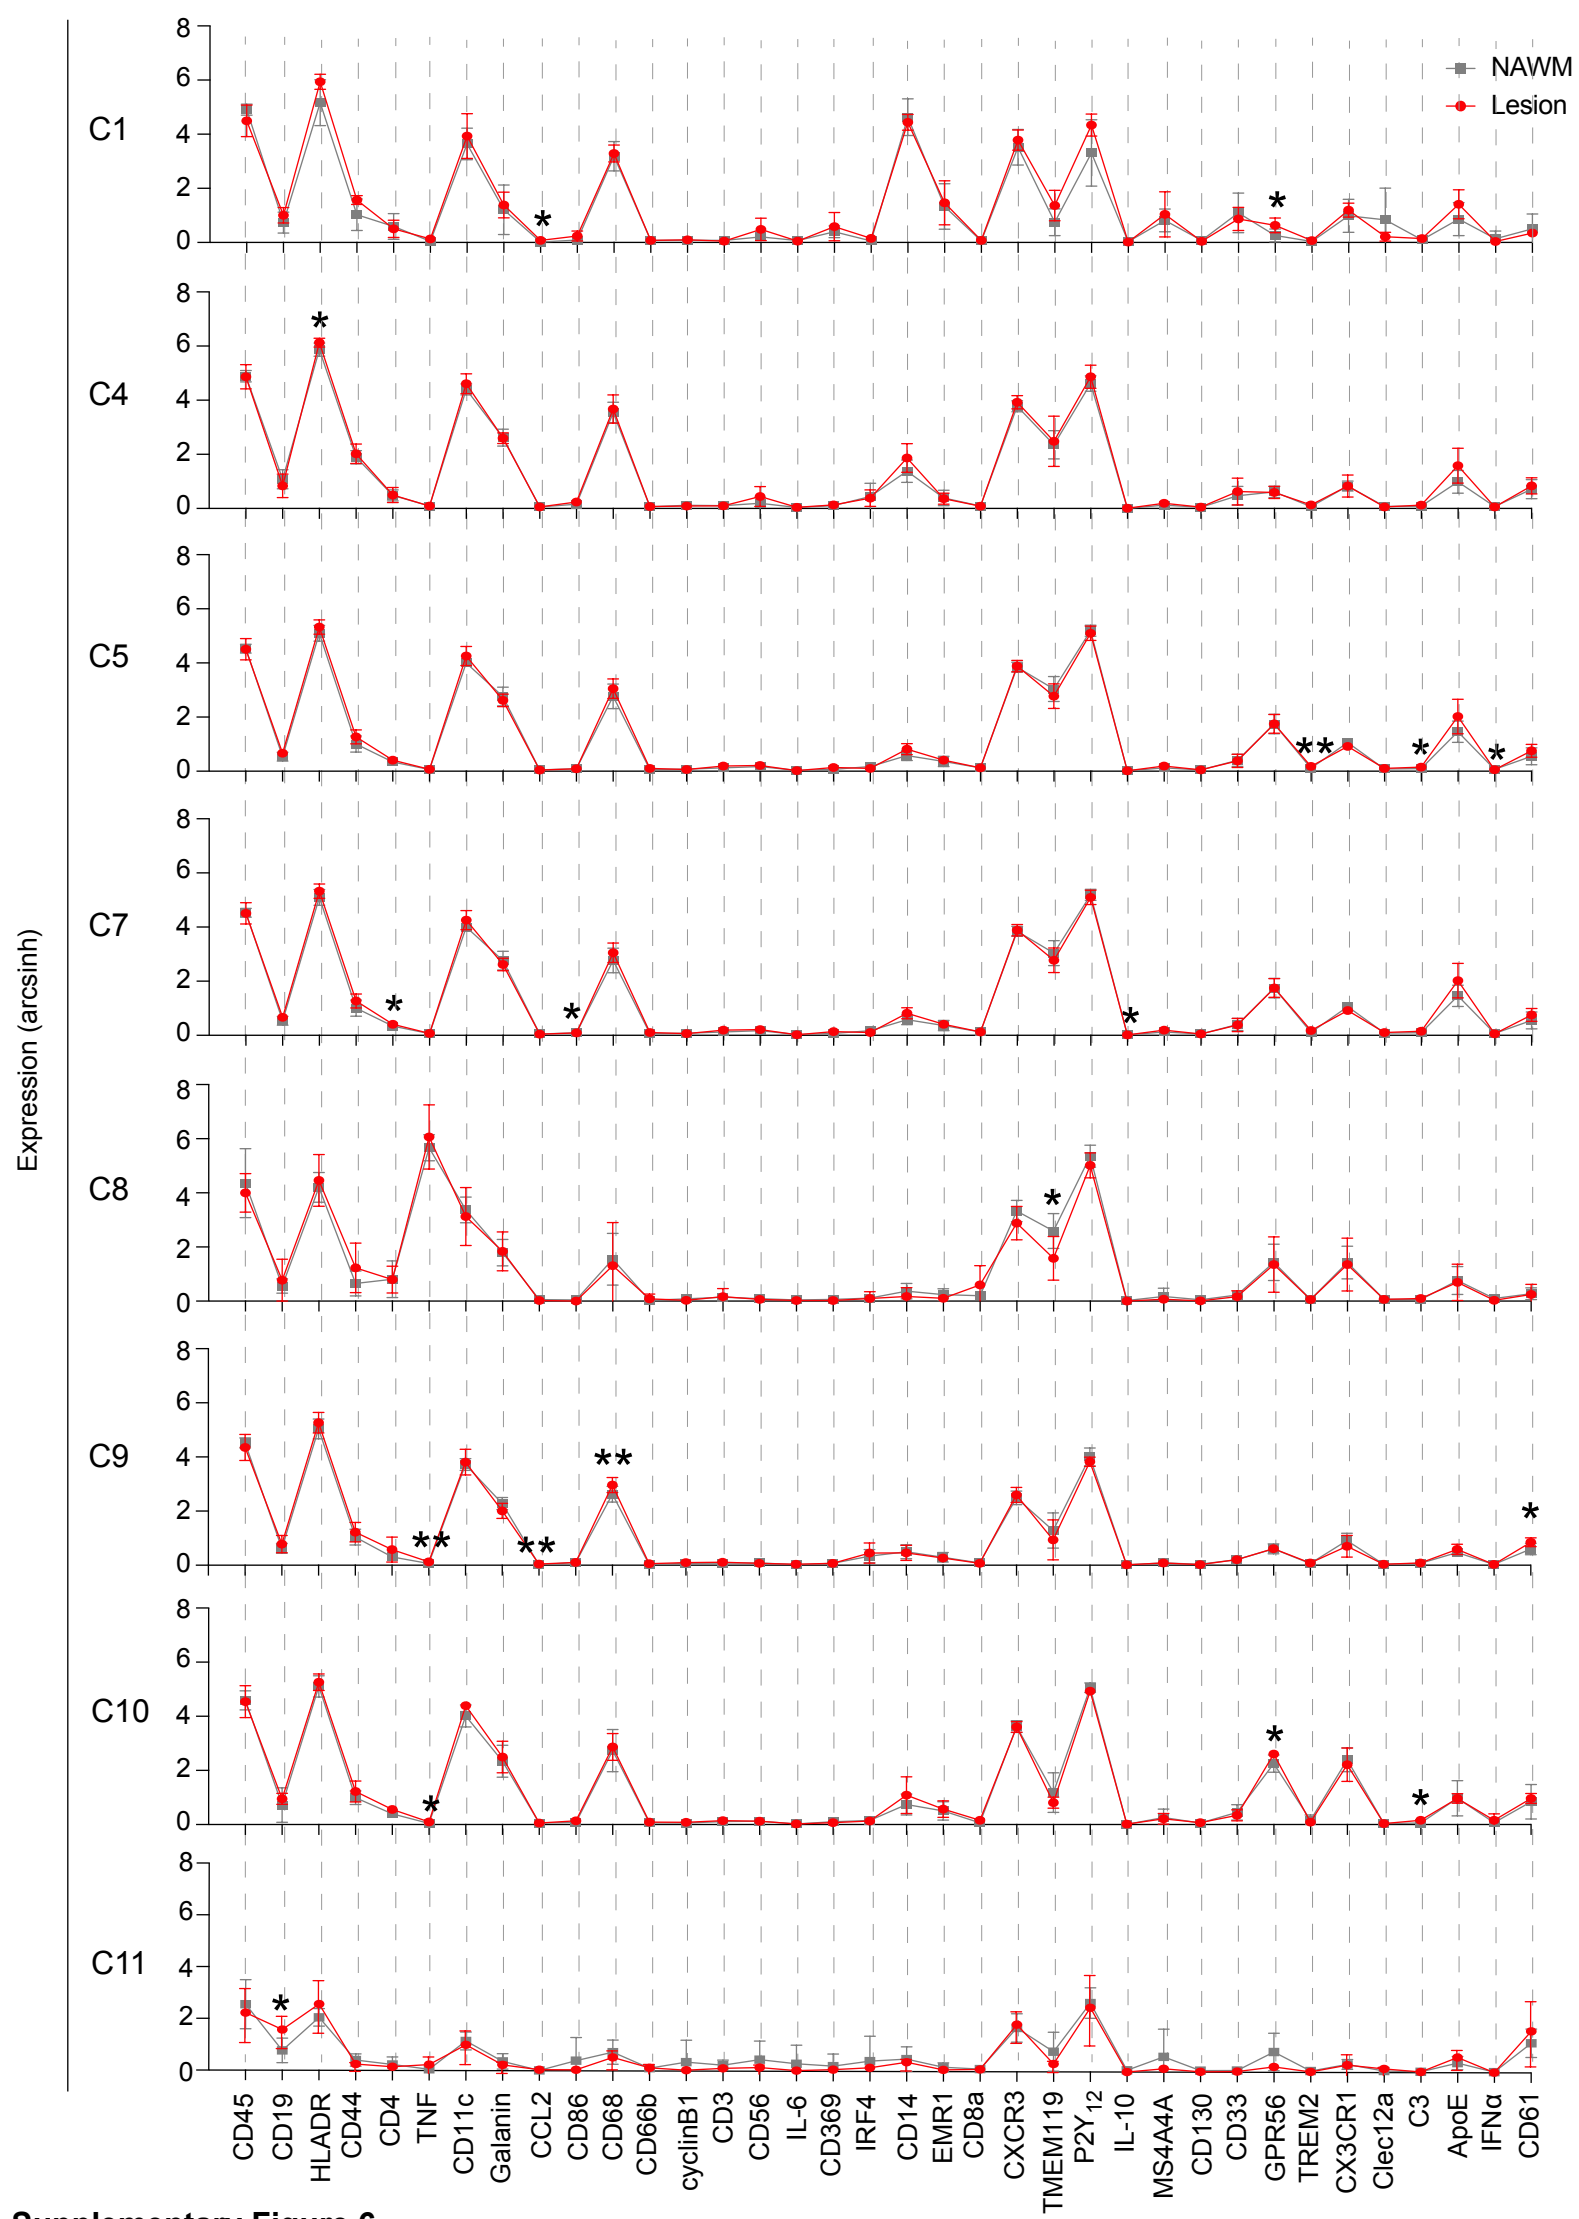

**a**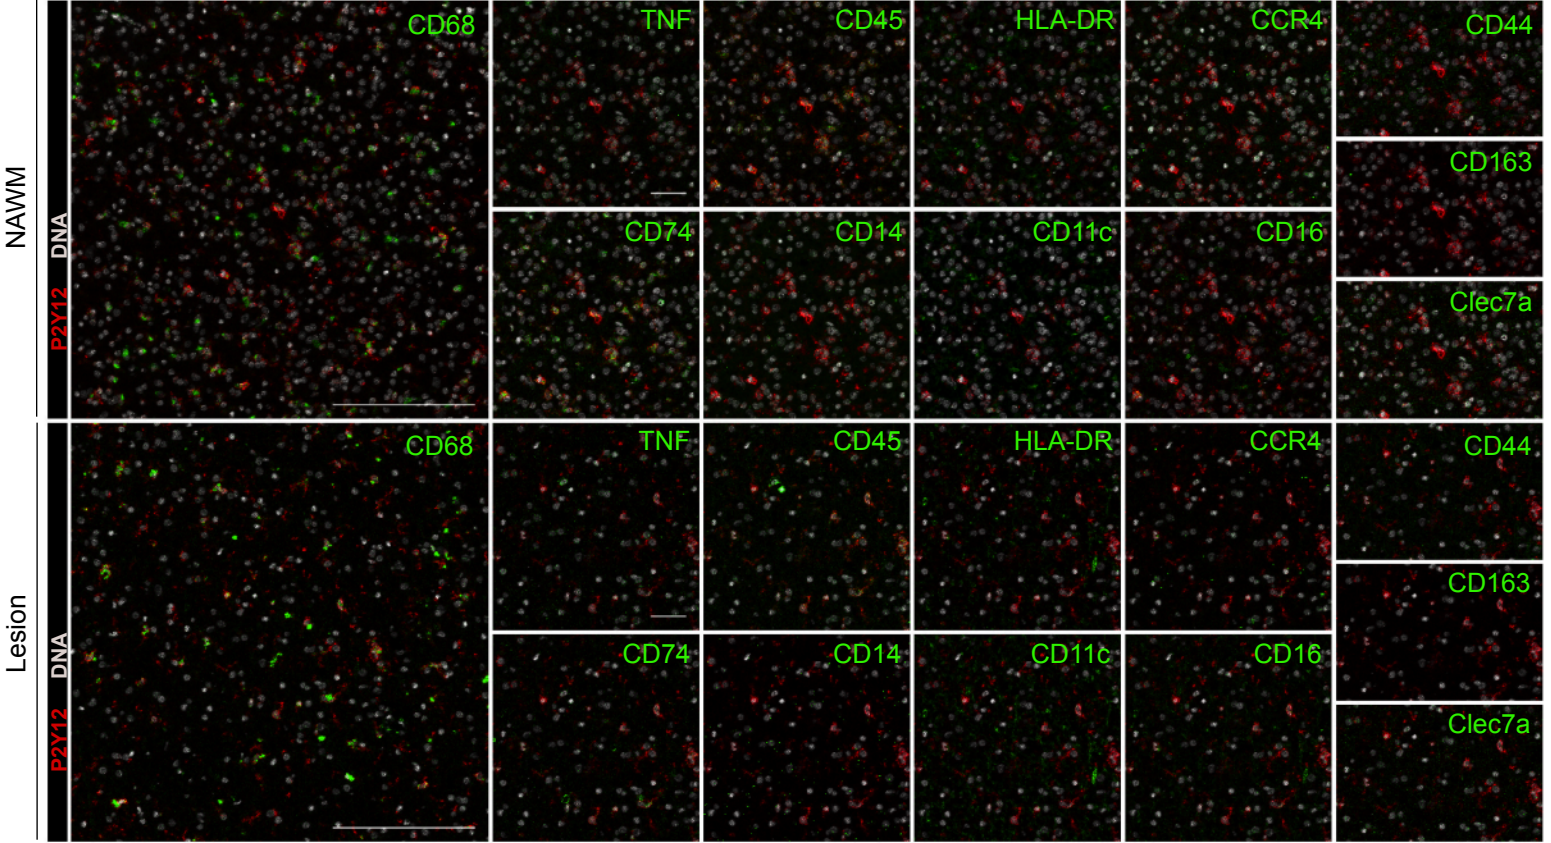**b**

PhenoGraph Heatmap

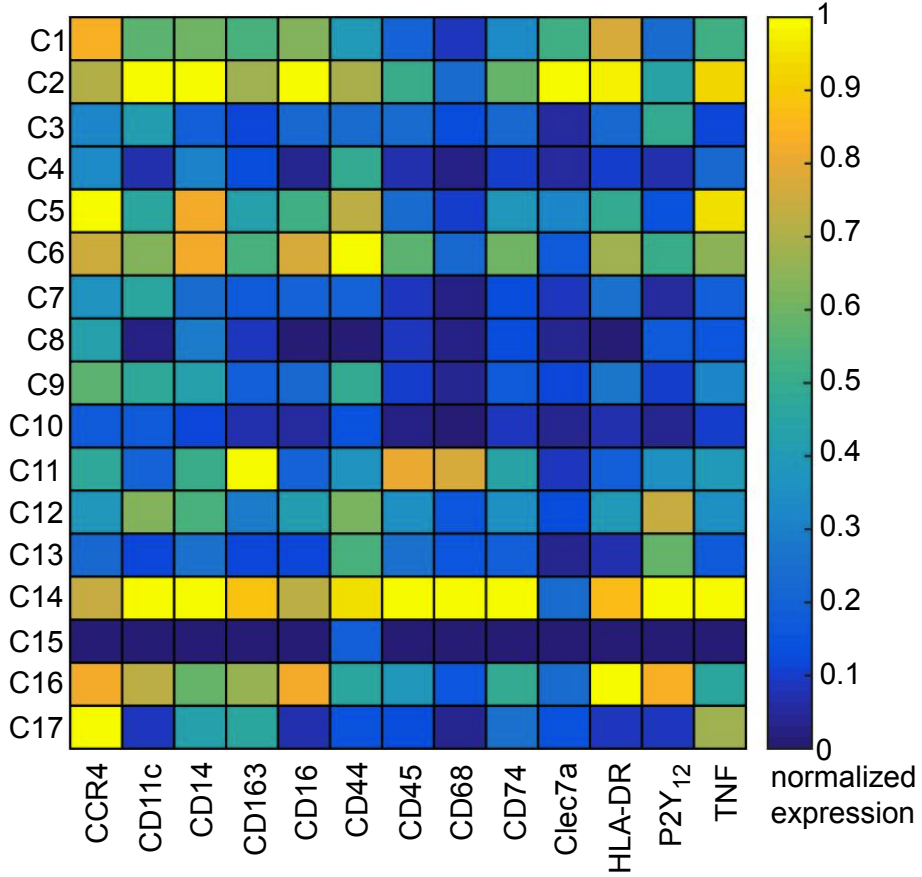

Supplementary Figure 7

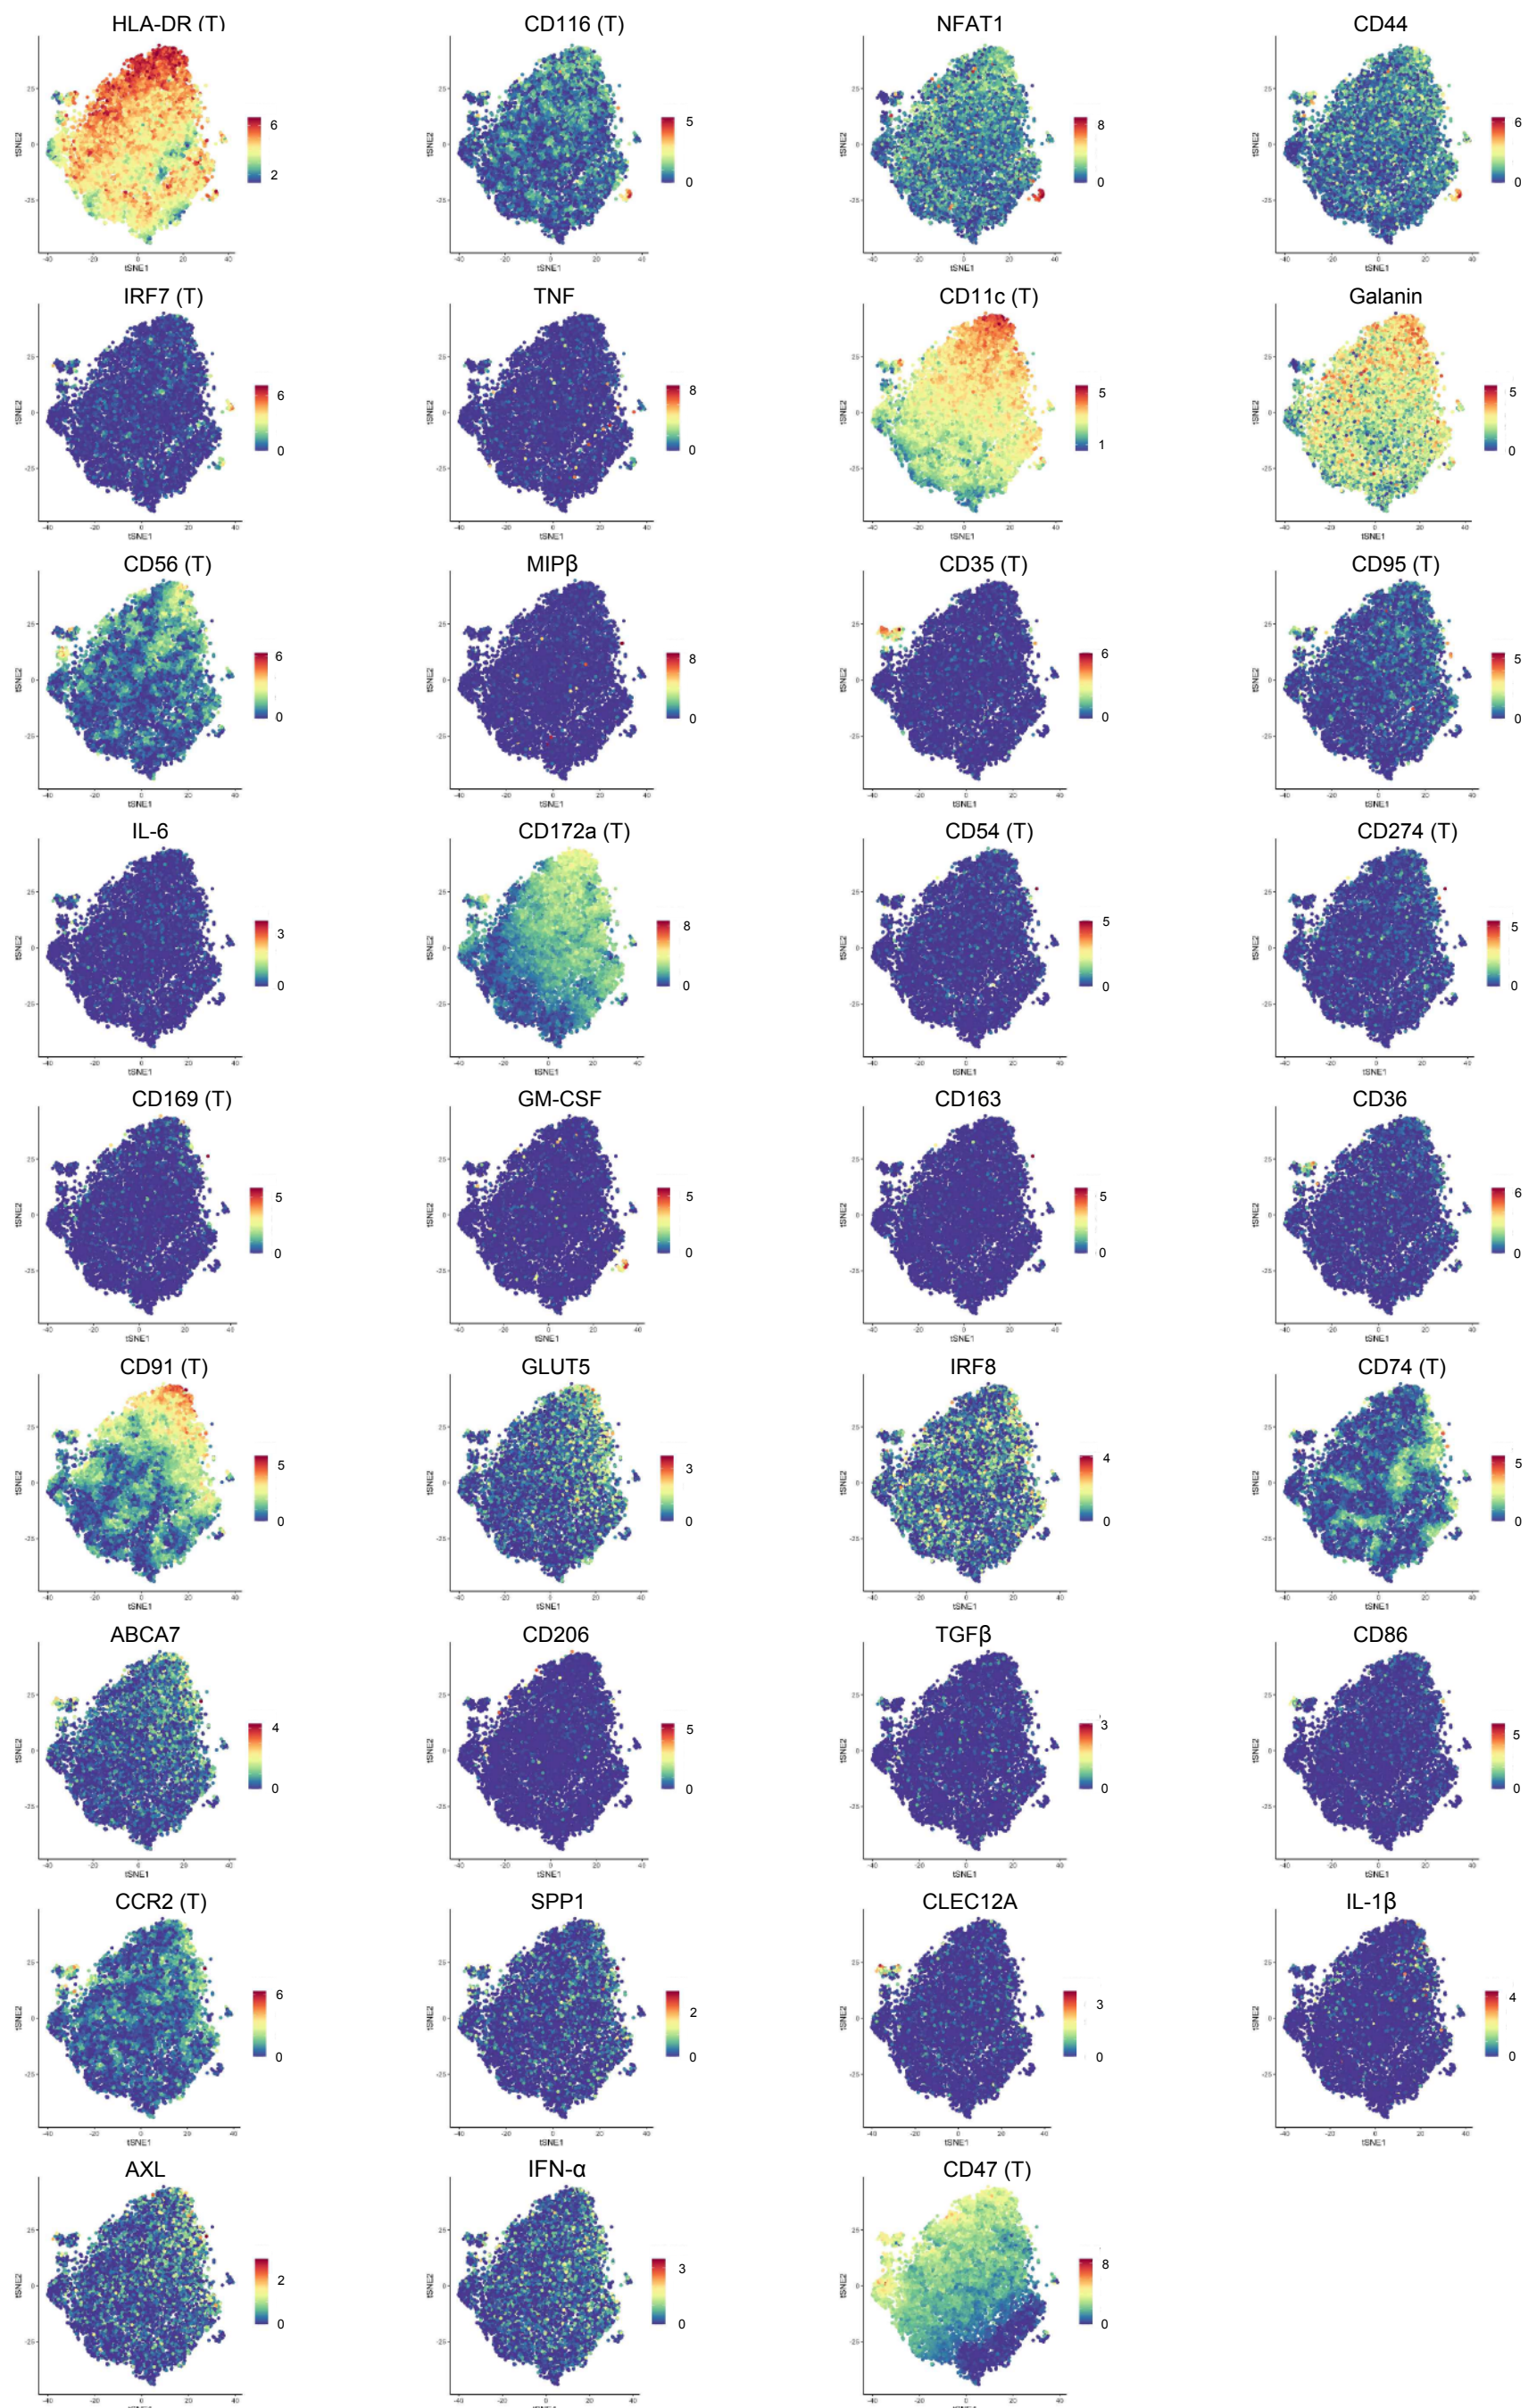

Supplementary Figure 8.



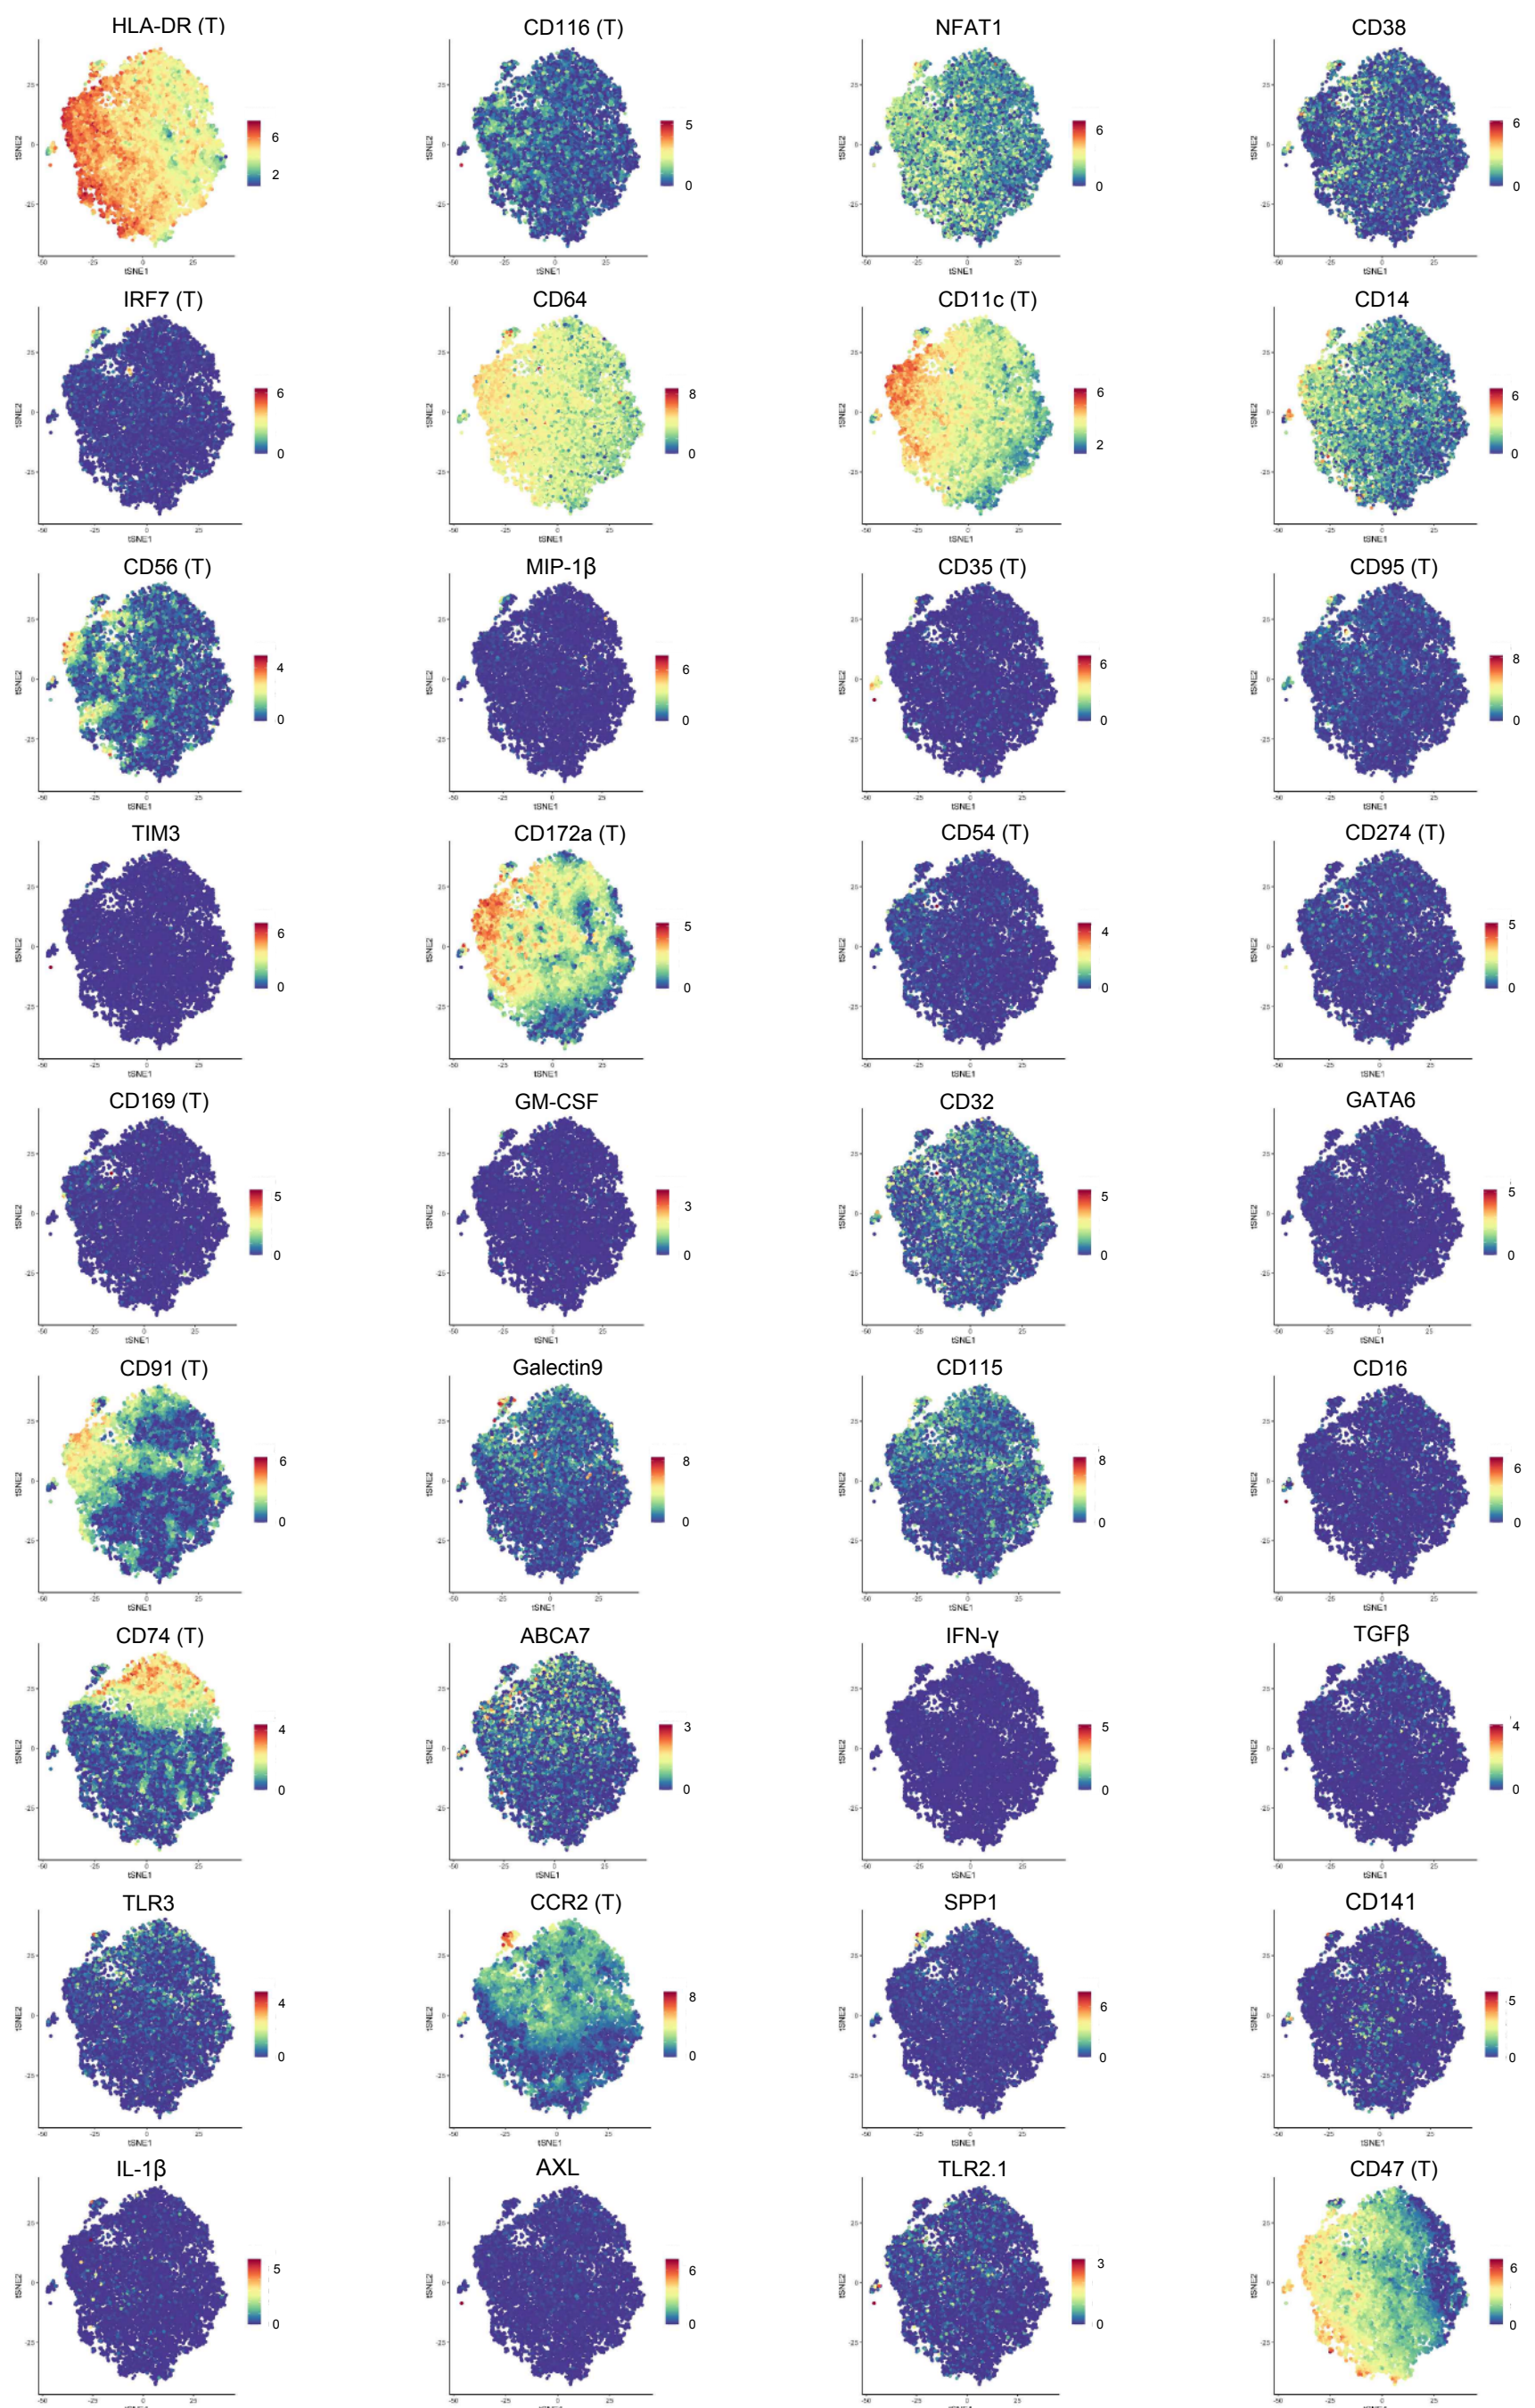

Supplementary Figure 9.

**a***Exp-II*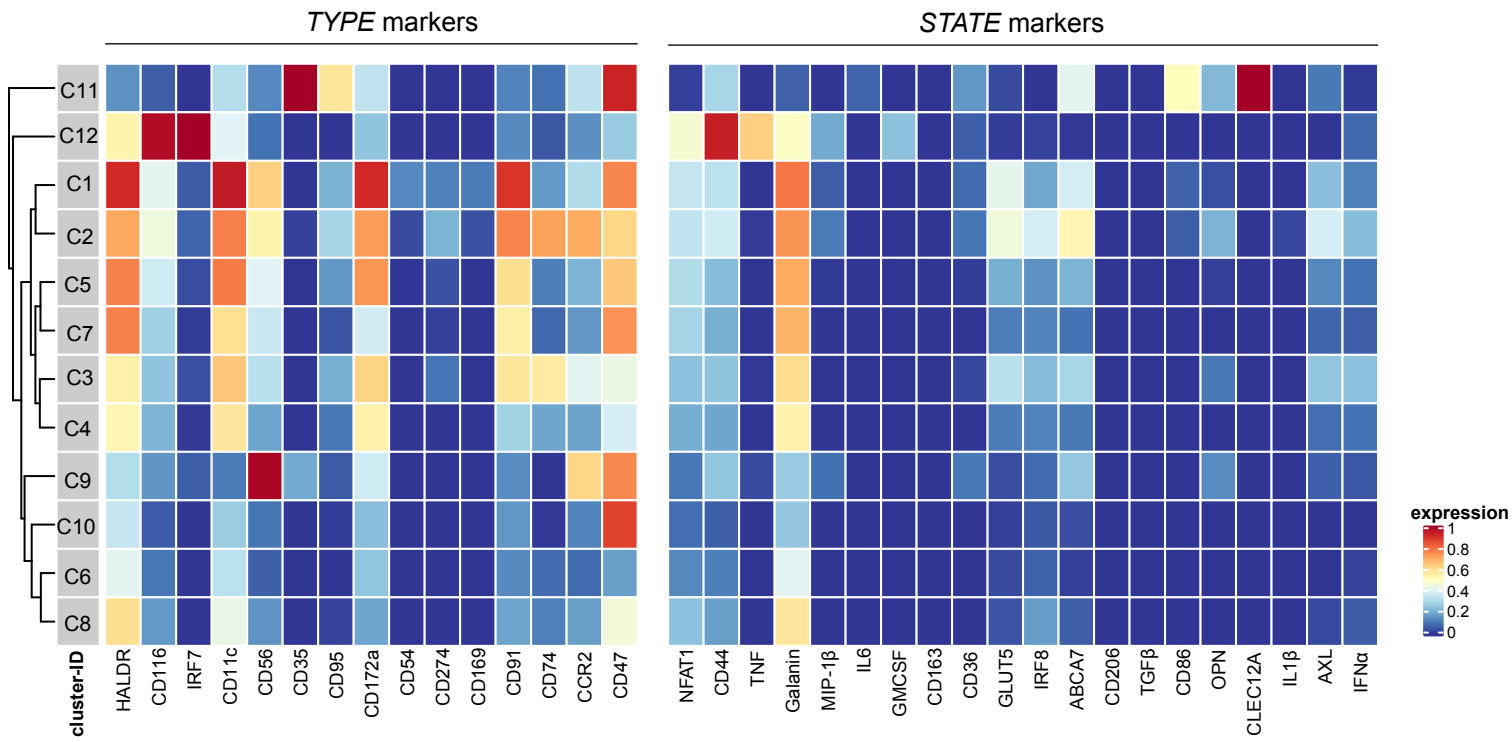**b***Exp-III*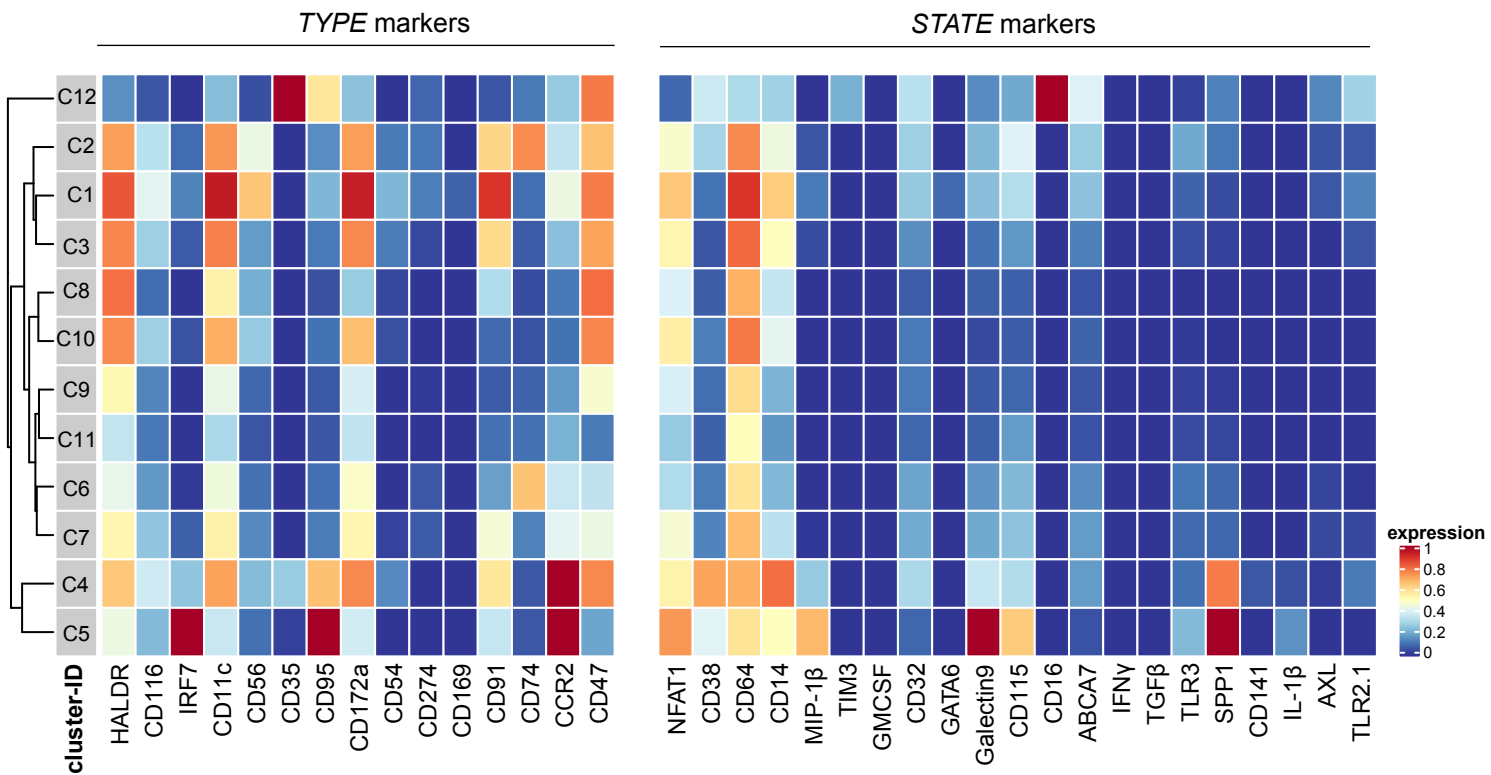

Supplementary Figure 10

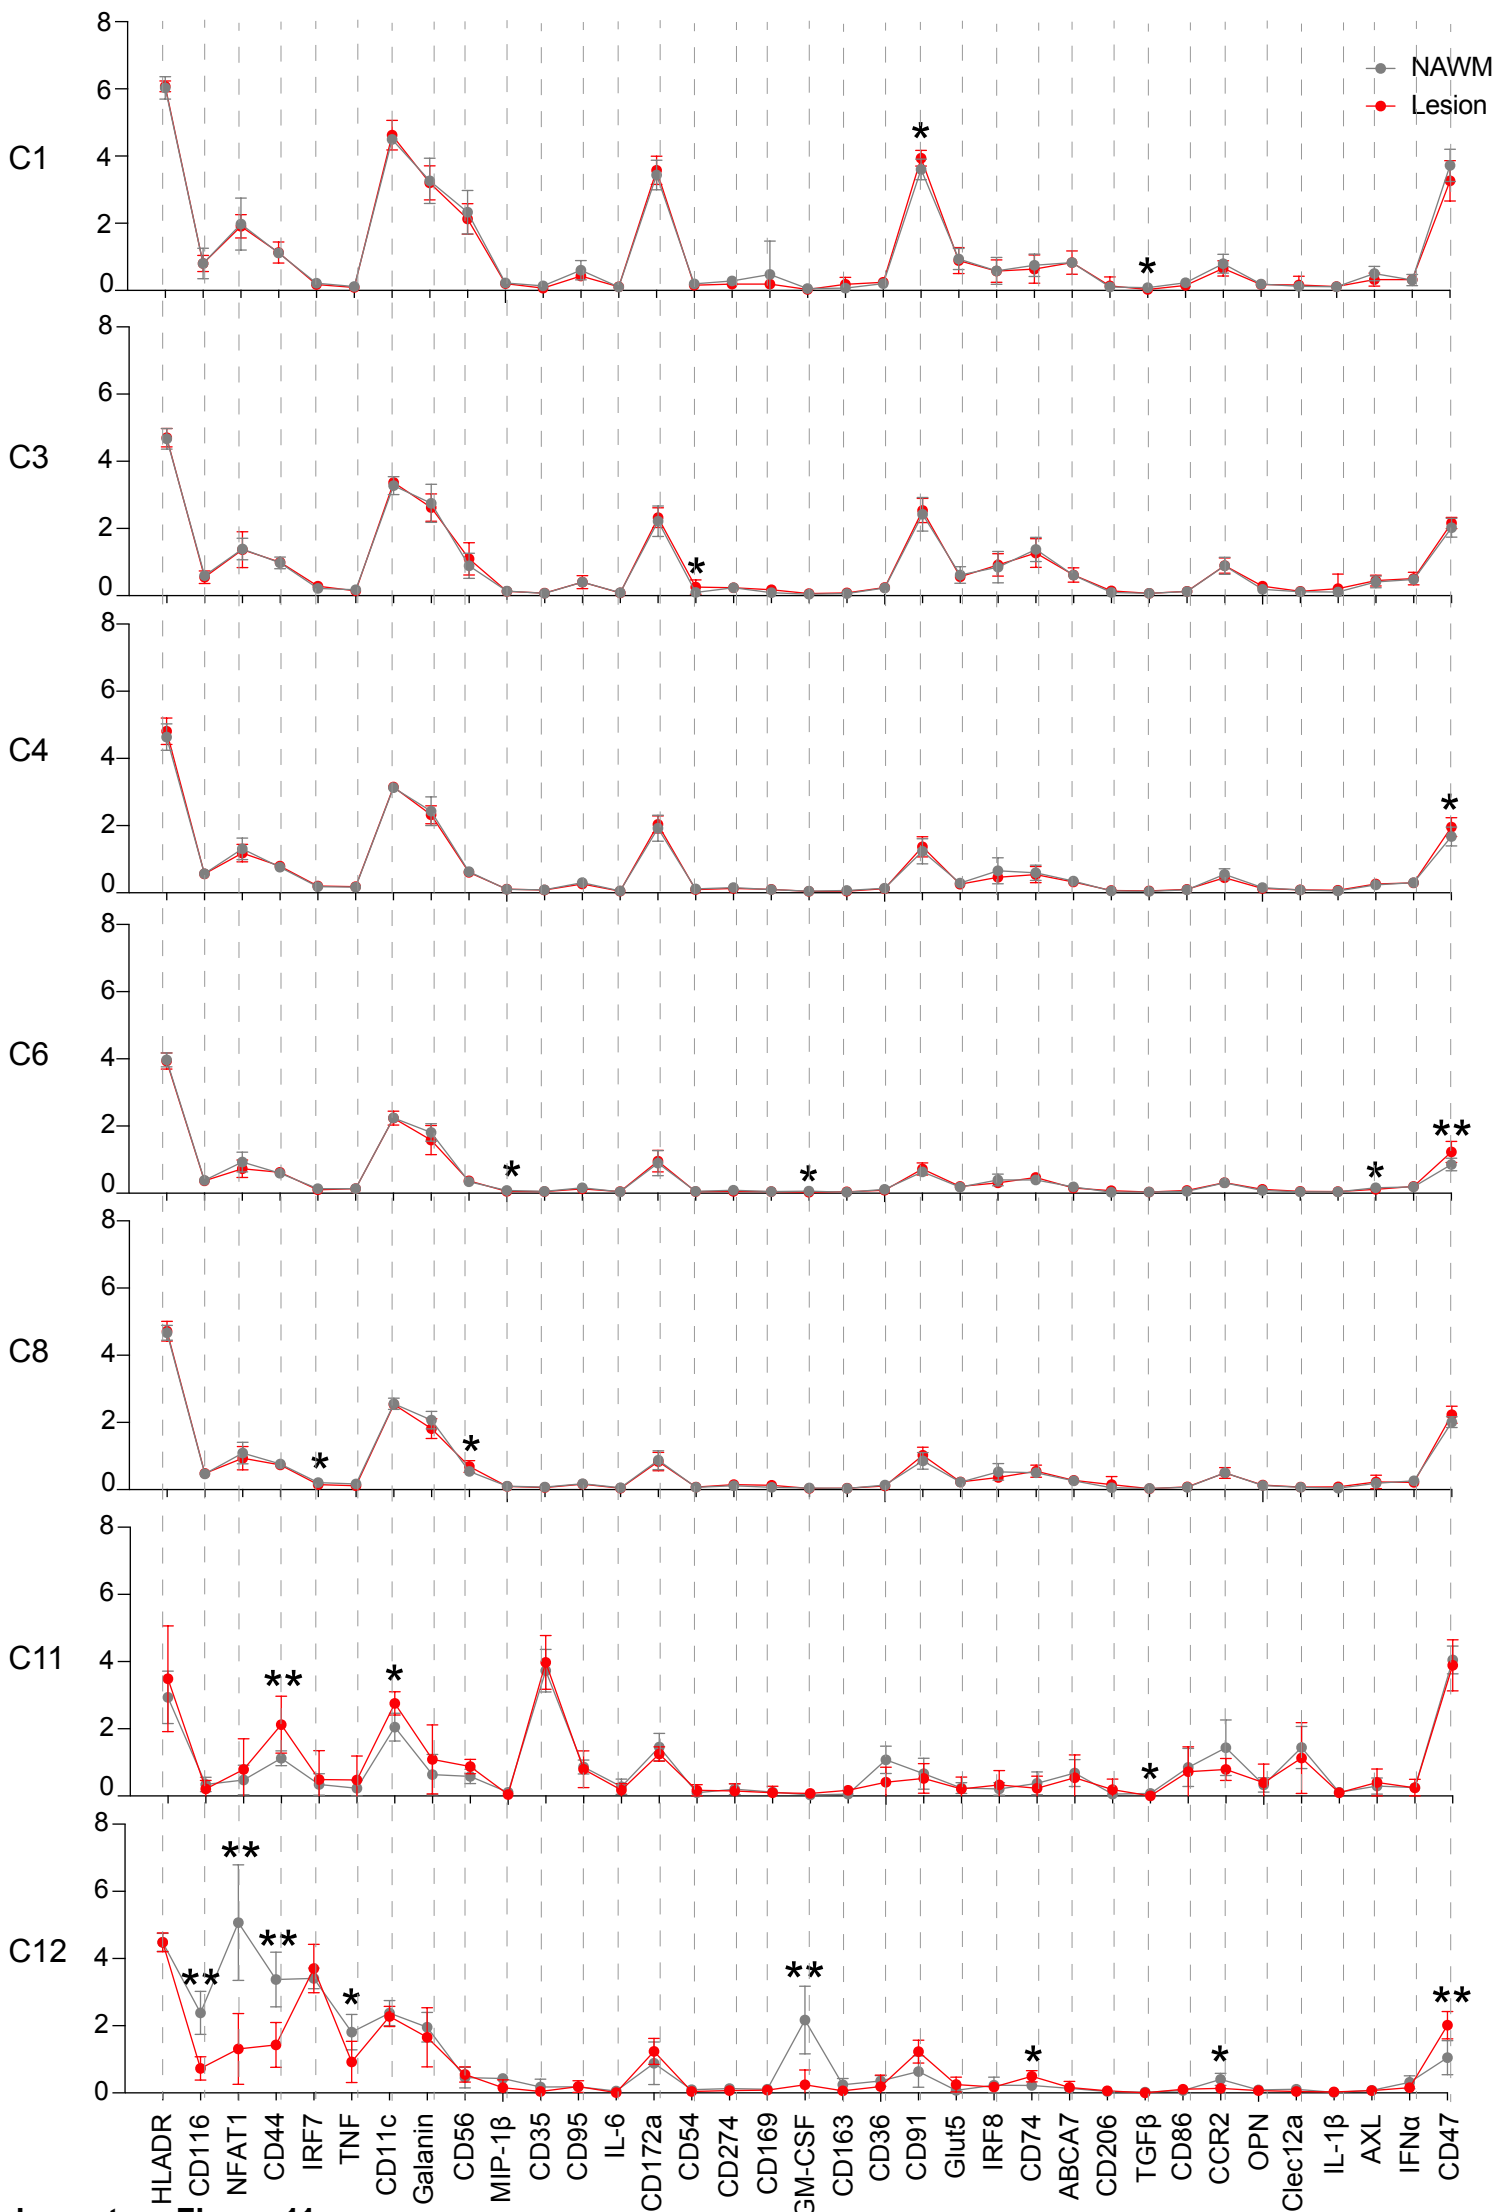

■ NAWM  
● Lesion

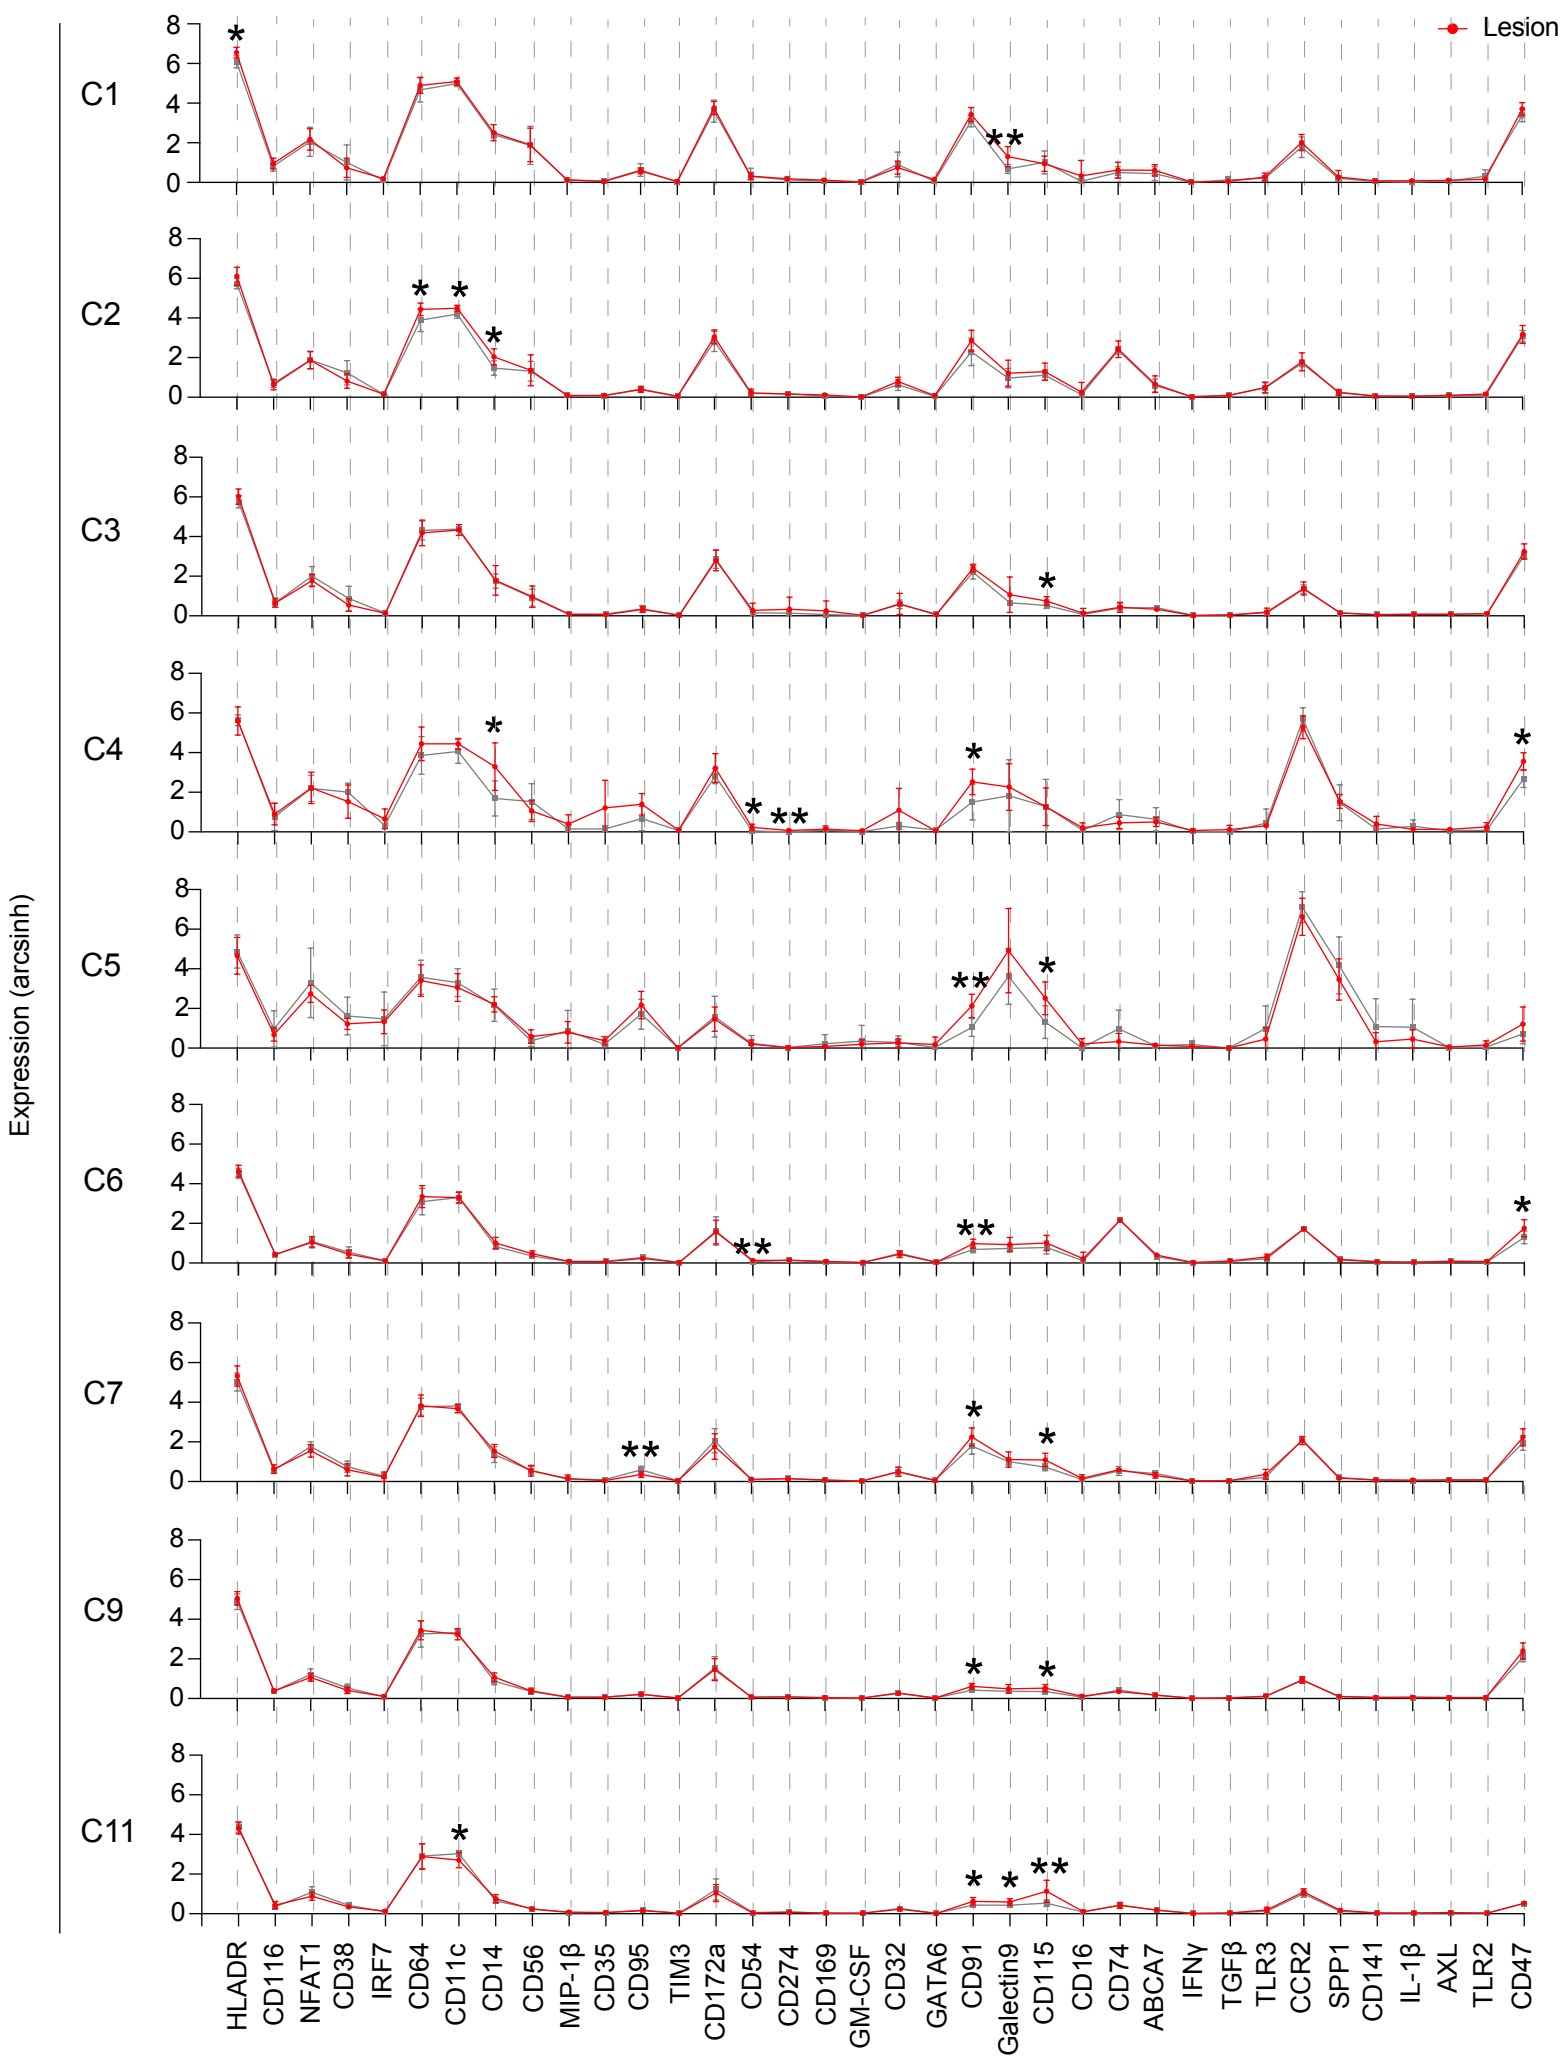

Supplementary Figure 12

## Figure legends

**Supplementary Figure 1 Flow cytometry analysis of microglia isolated from MS brain donors.** Representative dot plots showing about 50% of total events were cells (SSC-A vs FSC-A) of which more than 90% are cell-singlets (FSC-W vs FSC-H and SSC-W vs SSC-H). Of note, these cell-singlets were identified as DNA ( $^{191/193}\text{Ir}$ )-positive in CyTOF, whereas the other events were DNA-negative. More than 70% of detected single cells were viable (Live/Dead vs FCS-A) and > 95% are myeloid cells ( $\text{CD45}^+\text{CD3}^-\text{CD19}^-$  and  $\text{CD45}^+\text{CD11b}^+$ ).

**Supplementary Figure 2 MS lesion characterization.** (a) Representative brain sections of control white matter (CON, upper image; scale bar = 1 mm) and normal appearing white matter (NAWM) as well as lesion-enriched white matter (Lesion) of donors with MS pathology (lower image; scale bar = 1 mm). NAWM tissue shows ramified microglia and intact myelin, based on HLA-DR and PLP staining, respectively. In active lesion, demyelinated center and active microglia/macrophages could be detected throughout the whole lesion. The majority of HLA-DR<sup>+</sup> cells in lesion MS are foamy microglia/macrophages. Scale bar of high resolution pictures is 50  $\mu\text{m}$ . (b) Isolated IRF8<sup>+</sup> nuclei, enriched for microglia genes show conserved expression of homeostatic genes *CX3CR1*, *TMEM119*, *P2RY12* and *ADGRG1* in active MS lesions (n=5) as compared to NAWM (n=7), detected by RT-qPCR. (c) Microglial expression of *CX3CR1*, *P2Y<sub>12</sub>* and *GPR56* is also not changed at protein level in active MS lesions (n=4-8) compared to NAWM (n=4-8), detected by flow cytometry. Statistical testing: Mann Whitney test and Wilcoxon paired *t*-test. (d) Representative laser confocal microscopic images of CON, NAWM and lesion WM tissues showing microglia as P2Y<sub>12</sub><sup>+</sup> cells (green), and nuclei are counterstained with DAPI (blue). The graph shows the quantification of P2Y<sub>12</sub><sup>+</sup> cells in CON, NAWM and lesion WM tissues. Statistical testing: Brown-Forsythe and Welch ANOVA test; \*  $p < 0.05$  and \*\*  $p < 0.01$ .

**Supplementary Figure 3 Immunohistochemistry analysis of P2Y<sub>12</sub><sup>+</sup> cells.**

Representative laser confocal microscopic images of NAWM and lesion WM tissues showing CD68 (red, **a**) and HLA-DR (red, **b**) expression on P2Y<sub>12</sub><sup>+</sup> (green) microglia, and nuclei are counterstained with DAPI (blue). The graph shows the quantification of CD68<sup>+</sup>P2Y<sub>12</sub><sup>+</sup> (**a**) and HLA-DR<sup>+</sup>P2Y<sub>12</sub><sup>+</sup> (**b**) cells in NAWM and lesion WM tissues. Statistical testing: Mann-Whitney test;  $p < 0.05$  was considered as statistically significant.

**Supplementary Figure 4 Marker expression-*Exp-I*.** The overlaid t-SNE plot of 8 NAWM and 7 lesion white matter samples. The 2D t-SNE maps were generated based on expression levels of all markers of *Exp-I* (Supplementary Table 8), each dot represents a cell and the color denotes the expression level of each targeted protein.

**Supplementary Figure 5 TREM2 expression.** Dot plot graph show TREM2 expression (*Exp-I*) of hoMG C3 cluster compared to the lower abundant C8 and enriched clusters C1 and C11 in active lesions.

**Supplementary Figure 6 Cluster-wise assessment of phenotypic differences (*Exp-I*).**

The graphs showed differential marker expression (mean  $\pm$  sd) between myeloid cells from NAWM and lesion WM tissues within each defined cluster. Small phenotypic differences between the studied groups were found in defined cluster C1, C4, C5, C7, C8, C9, C10 and C11, whereas no significant differences in marker expression were observed in C2, C3, C6, and C12. Statistical testing: Mann-Whitney test; \*  $p < 0.05$  and \*\*  $p < 0.05$ .

**Supplementary Figure 7 Analysis of myeloid cell heterogeneity using imaging CyTOF.**

(a) Representative IMC images of normal-appearing white matter (NAWM) and Lesion WM

(scale bar = 200  $\mu\text{m}$  (low resolution) and 50  $\mu\text{m}$  (high resolution)) show expression of 13 markers analyzed. **(b)** Heat map demonstrates the phenotypic diversity of all clusters characterized using PhenoGraph. The heat color shows expression levels of all markers used for the analysis.

**Supplementary Figure 8 Marker expression-*Exp-II*.** The overlaid t-SNE plot of 10 NAWM and 8 lesion white matter samples. The 2D t-SNE maps were generated based on expression levels of all markers of *Exp-II* (Supplementary Table 8), each dot represents a cell and the color denotes the expression level of each targeted protein.

**Supplementary Figure 9 Marker expression-*Exp-III*.** The overlaid t-SNE plot of 8 NAWM and 9 lesion white matter samples. The 2D t-SNE maps were generated based on expression levels of all markers of *Exp-III* (Supplementary Table 8), each dot represents a cell and the color denotes the expression level of each targeted protein.

**Supplementary Figure 10 FlowSOM phenotypic heat maps – *Exp-II* and *-III*.** Heat map cluster demonstrates the expression levels of all markers used for the cluster analysis in *Exp-II* **(a)** and *Exp-III* **(b)**. Heat colors of expression levels have been scaled for each marker individually (to the 1<sup>st</sup> and 5<sup>th</sup> quintiles) (red, high expression; blue, low expression).

**Supplementary Figure 11 Cluster-wise assessment of phenotypic differences (*Exp-II*).** The graphs showed differential marker expression (mean  $\pm$  sd) between myeloid cells from NAWM and lesion WM tissues within each defined cluster. Small phenotypic differences between the studied groups were found in cluster **C1**, **C3**, **C4**, **C6**, **C8** and **C11**, whereas strongly decreased expressions of CD116, NFAT1, CD44 and GM-CSF in lesion-associated myeloid cells were detected in cluster **C12**. No significant differences in marker expression

were observed in **C2, C5, C7, C9** and **C10**. Statistical testing: Mann-Whitney test; \*  $p < 0.05$  and \*\*  $p < 0.05$ .

**Supplementary Figure 12 Cluster-wise assessment of phenotypic differences (Exp-III).**

The graphs showed differential marker expression (mean  $\pm$  sd) between myeloid cells from NAWM and lesion WM tissues within each defined cluster. Small phenotypic differences between the studied groups were found in cluster **C1, C2, C3, C4, C5, C6, C7, C9** and **C11**, whereas no significant differences in marker expression were observed in **C8, C10** and **C12**. Statistical testing: Mann-Whitney test; \*  $p < 0.05$  and \*\*  $p < 0.05$ .
